# Supplementary material
Source: publisher site journal article supplement (https://www.dovepress.com/article/461039)
Supplement: Supplementary file 1 [file get_supplementary_file.php]

**Table S1 Resistance genes in the bacterial Isolates in this work**

| **Number** | **Isolate** | **Resistance gene** | **Resistance phenotype** |
| --- | --- | --- | --- |
| 1 | 30860 | *bla*KPC-2 | β-lactams |
| 2 | *blaTEM-1B* |
| 3 | *bla*ACT-10 |
| 4 | *aac(6')-Iic* | Aminoglycosides |
| 5 | *aac(6')-Ib3* |
| 6 | *aac(6')-Ib-cr* |
| 7 | *aadA2b* |
| 8 | *aph(3')-Ia* |
| 9 | *tet*(C) | Tetracyclines |
| 10 | *tet*(D) |
| 11 | *catA2* | Phenicols |
| 12 | *fosA* | Fosfomycins |
| 13 | *mcr-9* | Phosphoethanolamines |
| 14 | *sul1* | Sulphonamides |
| 15 | 172116965 | *bla*KPC-2 | β-lactams |
| 16 | *bla*TEM-1B |
| 17 | *bla*CMY-82 |
| 18 | *aac(3)-IId* | Aminoglycosides |
| 19 | *aadA2* |
| 20 | *armA* |
| 21 | *mph*(E) | Macrolides |
| 22 | *msr*(E) |
| 23 | *tet*(B) | Tetracyclines |
| 24 | *dfrA12* | Trimethoprims |
| 25 | *sul1* | Sulphonamides |
| 26 | *qnrB10* | Quinolones |
| 27 | A1706 | *bla*KPC-2 | β-lactams |
| 28 | *bla*OXA-1 |
| 29 | *bla*TEM-1B |
| 30 | *bla*NDM-1 |
| 31 | *bla*CTX-M-15 |
| 32 | *bla*CTX-M-14 |
| 33 | *bla*SHV-33 |
| 34 | *blaLAP-2* |
| 35 | *aac(3)-Iid* | Aminoglycosides |
| 36 | *aac(6')-Ib-cr* |
| 37 | *aph(6)-Id* |
| 38 | *aph(3'')-Ib* |
| 39 | *tet*(A) | Tetracyclines |
| 40 | *tet*(D) |
| 41 | *dfrA1* | Trimethoprims |
| 42 | *sul1* | Sulphonamides |
| 43 | *sul2* |
| 44 | *catB3* | Phenicols |
| 45 | *qnrS1* | Quinolones |
| 46 | *oqxA* |
| 47 | *oqxB* |
| 48 | *arr-3* | Rifampicins |
| 49 | *fosA* | Fosfomycins |
| 50 | A1705 | *bla*KPC-2 | β-lactams |
| 51 | *bla*OXA-1 |
| 52 | *bla*NDM-1 |
| 53 | *bla*TEM-1B |
| 54 | *bla*SHV-33 |
| 55 | *bla*CTX-M-14 |
| 56 | *bla*CTX-M-15 |
| 57 | *blaLAP-2* |
| 58 | *aac(3)-IId* | Aminoglycosides |
| 59 | *aac(6')-Ib-cr* |
| 60 | *aph(6)-Id* |
| 61 | *aph(3'')-Ib* |
| 62 | *strA* |
| 63 | *strB* |
| 64 | *tet*(A) | Tetracyclines |
| 65 | *tet*(D) |
| 66 | *dfrA1* | Trimethoprims |
| 67 | *sul1* | Sulphonamides |
| 68 | *sul2* |
| 69 | *catB3* | Phenicols |
| 70 | *qnrS1* | Quinolones |
| 71 | *oqxA* |
| 72 | *oqxB* |
| 73 | *arr-3* | Rifampicins |
| 74 | *fosA* | Fosfomycins |
| 75 | NY5520 | *bla*KPC-2 | β-lactams |
| 76 | *bla*IMP-10 |
| 77 | *bla*OXA-10 |
| 78 | *bla*OXA-50 |
| 79 | *bla*PAO |
| 80 | *aac(6')-Ib-cr* | Aminoglycosides |
| 81 | *aac(6')-Ib3* |
| 82 | *aac(6')-Il* |
| 83 | *aadA1* |
| 84 | *aph(3')-IIb* |
| 85 | *ant(2'')-Ia* |
| 86 | *sul1* | Sulphonamides |
| 87 | *catB7* | Phenicols |
| 88 | *qnrVC1* | Quinolones |
| 89 | *fosA* | Fosfomycins |

**Table S2. Collection of IncG plasmids and *repA*IncG sequences**

| **IncG subtype** | **Plasmid** | **Plasmid accession number** | **Host bacterium** |
| --- | --- | --- | --- |
| IncG-Ⅰ | pWP7-S18-CRE-03_3 | AP022198 | *Klebsiella* sp. |
| IncG-Ⅱ | pKAM376_4 | AP024406 | *Aeromonas caviae* |
| IncG-Ⅲ | pFAHZU31-KPC | CP078010 | *Pseudomonas aeruginosa* |
| IncG-Ⅳ | pRHBSTW-00848_5 | CP055914 | *Citrobacter* sp. |
| IncG-Ⅴ | pRHBSTW-00696_5 | CP056345 | *Citrobacter* sp. |
| IncG-Ⅴ | pCOL-1 | KC609323 | *Pseudomonas aeruginosa* |
| IncG-Ⅴ | pWP3-S18-CRE-02_5 | AP022010 | *Klebsiella quasipneumoniae* |
| IncG-Ⅴ | pRHBSTW-00464_5 | CP056487 | *Klebsiella* sp. |
| IncG-Ⅴ | pRSB105 | DQ839391 | uncultured bacterium |
| IncG-Ⅴ | pLNU-11 | KX863568 | *Citrobacter freundii* |
| IncG-Ⅴ | pKRA-GES-5 | MN436715 | *Klebsiella pneumoniae* |
| IncG-Ⅴ | 2 | LS998784 | *Pseudomonas aeruginosa* |
| IncG-Ⅴ | Rms149 | AJ877225 | *Pseudomonas aeruginosa* |
| IncG-Ⅵ | pCfr-33795cz | MG558000 | *Citrobacter freundii* |
| IncG-Ⅶ | SDENCHOLpc | LT837806 | *Sterolibacterium denitrificans* |
| IncG-Ⅷ | pNY5520-KPC | CP096939 | *Pseudomonas aeruginosa* |
| IncG-Ⅷ | p9.2 | MG228256 | *Edwardsiella tarda* |
| IncG-Ⅷ | pBM527-3 | CP041049 | *Citrobacter* sp. |
| IncG-Ⅷ | pPS-MS-17-188-3 | CP027855 | *Plesiomonas shigelloides* |
| IncG-Ⅷ | pRIVM_C014947_3 | MT560066 | *Klebsiella pneumoniae* |
| IncG-Ⅷ | pJF-786 | KX912255 | *Enterobacter cloacae* |
| IncG-Ⅷ | pHN21SC1505-4 | CP091085 | *Enterobacter roggenkampii* |
| IncG-Ⅷ | pJBIWA001_5 | CP074187 | *Raoultella planticola* |
| IncG-Ⅷ | p12-2388.1 | CP038596 | *Salmonella enterica* subsp. *enterica serovar* Hadar |
| IncG-Ⅷ | p30860-KPC | MN477223 | *Enterobacter cloacae* |
| IncG-Ⅷ | p116965-KPC | MN539620 | *Citrobacter* sp. |
| IncG-Ⅷ | pA1705-KPC | MH909348 | *Klebsiella pneumoniae* |
| IncG-Ⅷ | pA1706-KPC | MH909350 | *Klebsiella pneumoniae* |
| IncG-Ⅷ | p10265-KPC | KU578314 | *Pseudomonas aeruginosa* |

*repA*IncG sequences of the corresponding plasmids were listed below:

>pWP7-S18-CRE-03_3 (AP022198)

atggggcaggcacagctacgacttttcagcccagccgatgaggcgggttgctatcacgacacagcccggcagggctttttctcgttgctcatggcgacgggcgagggcagcggcaaacggcaggacagttaccggctgtcacaaatgcccgtggtgctctccatgctcgacccgagccgcgacacctggctttcacaggccgagttcaccaagccaaaccgccgtgtcgtcaatctggcccgtatcgggctgctgttcgctgacttggacacctaccgcgagccgtgggcgcaggggcgcagccccgagcaactggccgccgctgtcatgttccgctgctacgacgaaggcgtgccgccgccgtcgatcctcgttttctctggccgtggcgtgcaagcaaagtggctgctggatggcacactgccgcgccaagcactgccgcgctggaatgcctgccagcgttatctgatcgaccgtctggccgggctgggtgctgatccagcggccaaggatgcaagccgcgtgctgcggctggtcaatacggtgaacagcaggagcggcgaggtttgccgcgtcatccacgtagaacaaggcccggacggcgagccgatccggtacaacttcgagtatctggccgaggcgctgctgccggtggcccgctgggacatcgaggccgaccgcaaggcccgcgccgaccgtcgccagttcaagctgctgccgggcggccaaaccggcaacctgcgcagcctcaacgggcggcaactggcgtgggatcggctggaggacttgcgcacgctggccgcgctgcgcggcggcgtggccgaaggcgagcggatgcagcaccttttctggcgtctcaacttcctgctgctgtccggggctacgaatagcgcccagatgtaccacgaagcggcagcactggcccgcgagctggattcatcctggaactaccgcagcaaggagctgatgacgctctacgcgaaggccaagcagtacgaagcgggcgagaaggtggagttcggcggcaagcagtttgcgccgctctacaccccgaagaatgacaccctgatttccctgttccgcatcaccgacgacgagcagcgcaagctgcgcacgctcatcagccgggacatggccgcagagcgccacagcgagcgcgagaaggcccgcaggcgtgccgctggggctgtcgatcgtgcttcctatctggaagcagccagcgccaagcaggcgcaggctttggccctcaaggcgcagggtctgagcgtgcgggccattgctgcacagatgggtattagtaagaccgctgccgggcgctacatcgcagagccgggagagtgtcccaagtccatgcgtattacaggcggggagggctga

>pKAM376_4 (AP024406)

ATGGGACAGGCACAGCTACGACTTTTCAGCCCAGCCGATGAGGCGGGTTGCTATCACGACACAGCCCGGCAGGGTTTTTTCTCGTTGCTCATGGCGACGGGCGAGGGCAGCGGCAAACGGCAGGACAGTTACCGGCTGTCACAGATGCCCGTGGTGCTCTCCATGCTCGACCACAGCCGGGATACCTGGCTGTCTCAGGCCGAGTTCATCAAGCCAAACCGCCGTGTCGTCAATCTGGCCCGTATCGGGCTGCTGTTCGCTGACTTGGACACCTACCGCGAGCCGTGGGCGCAGGGGCGCAGCCCCGAGCAACTGGCCGCCGCTGTCATGTTCCGCTGCTACGACGAAGGCGTGCCGCCGCCGTCGATCCTCGTTTTCTCTGGCCGTGGCGTGCAAGCAAAGTGGTTGCTGGATGGCACCTTGCCGCGTCAGGCGCTGCCGCGCTGGAATGCCTGCCAGCGTTACCTGATCGACCGTCTGGCCGGGCTGGGTGCTGATCCAGCGGCCAAGGATGCAAGCCGCGTGCTGCGGCTGGTCAATACGGTGAACAGCAAGAGCGGCGAGGTTTGCCGCGTCATCCACGTTGAGCAAGGCCCGGACGGCGAGCCGATCCGGTACAACTTCGAGTATCTGGCCGAGGCGCTGCTGCCGGTGGCCCGCTGGGACATCGAGGCCGACCGCAAGGCCCGCGCCGACCGTCGCCAGTTCAAGCTGCTGCCGGGCGGCCAAACCGGCAACCTGCGCAGCCTCAACGGGCGGCAACTGGCGTGGGATCGGCTGGAGGACTTGCGCACGCTGGCCGCGCTGCGCGGCGGCGTGGCCGAAGGCGAGCGGATGCAGCACCTTTTCTGGCGTCTCAACTTCCTGCTGCTTTCTGGTGCGACGCACAGCGGACAGATGTACCACGAGGCCGCCGCGCTGGCCCGTGAGCTTGATCCACGGTGGAACTACCGCAGCGCCGAGCTTATGACGCTGTACGCCAAGGCCAAGGCCCACGAAGCCGGGGAAAAGGTGGAGTTCGGCGGCAAGCAGTTTGCGCCGCTCTACACCCCGAAGAATGACACCCTGATTTCCCTGTTCCACATCACCGATGACGAGCAGCGCAAGCTGCGCACGCTCATCAGCCGGGACATGGCCGCAGAGCGCCACAGCGAGCGCGAGAAGGCCCGCAGGCGTGCCGCTGGGGCTGTCGATCGTGCTTCCTATCTGGAAGCAGCCAGCGCCAAGCAGGCGCAGGCTTTGGCCCTCAAGGCGCAGGGTCTGAGCGTGCGGGCCATTGCTGCACAGATGGGTATTAGTAAGACCGCTGCCGGGCGCTACATCGCAGAGCCGGGAGAGTGTCCCAAGTCCATGCGTATTACAGGCGGGGAGGGCTGA

>pFAHZU31-KPC (CP078010)

atggggcaggcacagctacgacttttcagcgccgatgatgaagcggcgacatatcacgacacagcccggcagggctttttctcgttgctcatggcgacgggcgagggcagcggcaagaagcaggacagttaccggctgtcacagatgcccgtggtgctctccatgctcgaccacagccgggatacctggctgtctcaggccgagttcatcaagccaaaccgccgtgtcgtcaatcttgcccgtatcgggctgctgttcgctgacttggacacctaccgcgagccgtgggcgcaggggcgcagccccgagcaactggccgccgctgtcatgttccgctgctacgacgaaggtgtgccgccgccgtcgatcctcgttttctctggccgtggcgtgcaagcaaagtggctgctggatggcaccttgccgcgtcaggcgctgccgcgctggaatgcctgccagcgttacctgattgaccgtctggccgggctgggcgctgatccagcggccaaggatgcaagccgcgtgctgcggctggtcaatacggtgaacagcaagagcggcgaggtttgccgcgtcatccacgttgagcaaggcccggacggcgagccgatccggtacaacttcgagtatctggcggaggcgctgctgccggtggcccgctgggacatcgaggccgaccgcaaggcccgcgccgaccgtcgccagttcaagctgctgccgggcggccaaaccggcaacctgcgcagcctcaacgggcggcaactggcgtgggatcgtctggaggacttgcgcacgctggccgcgctgcgcggcggcgtggccgaaggcgagcggatgcagcacctgttttggcggctgaacttcctgctgctgtcaggcgcgacgcacacgggccagatgtaccacgaggccgccgcgctggcccgtgagcttgatccacggtggaactaccgcagcgccgagcttatgacgctgtacgccaaggccaaggctcacgaagccggggaaaaggtggagttcggcggcaagcagtttgcgccgctttacacgcccaagaacgacacgctgatttccctgttccacatcaccgacgacgagcaacgcaagctgcgcacgctcattagccgggacatggccgcagagcgccacagcgagcgcgagaaggcccgcaggcgtgccgctggggctgtcgatcgtgcgacctatgaggccaattccgcgagccgtcagaagccgtgggaagccttgggcatgagccgccgcagttggtatcgggcagggaaaccagccgcgcctgccgatggcacaagtccgtgcgtattacaggcggaggcggggaaatga

>pRHBSTW-00848_5 (CP055914)

atgggacaggcacagctacgacttttcagcccagccgatgaggcgggttgctatcacgacacagcccggcagggctttttctcgttgctcatggcgacgggcgagggcagcggcaagaagcaggacagttaccggctgtcacagatgcctgtggtgctctccatgctcgaccacagccgggatacctggctgtctcaggccgagttcatcaagccaaaccgccgtgtcgtcaatctggcccgtatcgggctgctgttcgctgacttggacacctaccgcgagccgtgggcgcaggggcgcagccccgagcaactggccgccgctgtcatgttccgctgctacgacgaaggcgtgccgccgccgtcgatcctcgttttctctggccgtggcgtgcaagccaaatggctgttggatggcaccctgccgcgtcaggcgctgccacgctggaatgcctgccagcgttacctgatcgaccgtctggccgggctgggcgctgatccagcggccaaggatgcaagccgcgtgctgcggctggtcaatacggtgaacagcaagagcggcgaggtttgccgcgtcatccacgtagaacaaggcccggacggcgagccgatccggtacaactttgagtatctggccgaggcgctgctgccggtggcccgctgggacatcgaggccgaccgcaaggcacgcgccgaccgtcgccagttcaagctgctgccgggcggccaaaccggcaacctgcgcacgctcaacgggcggcaactggcgtgggatcgtctggaggacttgcgcacgctggccgcgctgcgcggcggcgtggccgagggcgagcggatgcagcacctgttttggcggctgaatttcctgctgctgtcaggtgcgacgcacaccggccagatgtaccacgaggccgccgcgctggcccgtgagcttgacccacggtggaactaccgcagcgccgagcttatgacgctgtacgccaaggccaaggctcacgaagccggggaaaaggtggagttcggcggcaagcagtttgcgccgctctacacgcccaagaacgacacgcttatcagcctgtttcacatcaccgacgacgaacagcgcaagctgcgcacgctcatcagccgggatatggccgcagagcgccacaggaagcgtgacgaggcccgcaggcgggccgctggggctgtcgatcgtgcgacctatgaggccaattccgcgagccgtcagaagccgtgggaaaccttgggcatgagccgggcaagctggtatcgagcaggcaagccaatgccagcggttgagacaagtccctgcgtattacaggccgctgcgggtgattcagatgcgtga

>pRHBSTW-00696_5 (CP056345)

atgggacaggcacagctacgacttttcagcccagccgatgaggcgggttgctatcacgacacagcccgacagggctttttctcgttgctcatggcgacgggcgagggcagcggcaagaagcaggacagttaccggctgtcacagatgcccgtggtgctctccatgctcgaccacagccgggatacgtggctgtctcaggccgagttcatcaagccaaaccgccgtgtcgtcaatctggcccgtatcgggctgctgttcgctgacttggacacctaccgcgagccgtgggcgcaggggcgcagccccgagcaactggccgccgctgtcatgttccgctgctacgacgaaggcgtgccgccgccgtcgatcctcgttttctctggccgcggcgtgcaagcaaagtggctgctggatggcaccttgccgcgtcaggcgctgccacgctggaatgcctgccagcgttacctgatcgaccgtctggccgggctgggcgctgatccagcggccaaggatgcaagccgcgtgctgcggctggtcaatacggtgaacagcaagagcggcgaggtttgccgcgtcatccacgttgagcaaggcccggacggcgagccgatccggtacaacttcgagtatctggccgaggcgctactgccggtggcccgctgggacatcgaggccgaccgcaaggcccgcgccgaccgtcgccagttcaagctgctgccgggcggccaaaccggcaacctgcgcacgctcaacgggcggcaactggcgtgggatcgtctggaggacttgcgcacgctggccgcgctgcgcggcggcgtggccgagggcgagcggatgcagcacctgttttggcggctgaatttcctgctgctgtcaggtgcgacgcacgccggccagatgtaccacgaggccgccgcgctggcccgtgagcttgacccacggtggaactaccgcagcgccgagcttatgacgctgtacgccaaggccaaggctcacgaagccggggaaaaggtggagttcggcggcaagcagtttgcgccgctctacacgcccaagaacgacacgcttatcagcctgtttcacatcaccgacgacgagcagcgcaagctgcgcacgctcatcagccgggacatggccgcagagcgccacagcgagcgcgagaaagcccgcagacgtgccgctggggctgtcgatcgtgcttcctatctggaagcagccagcgccaagcaggcgcaggctttggccctcaaggcgcagggtctgagcgtgcgggccattgctgcacagatgggcattagcaagaccgctgccgggcgctacatcgcagagccgggagagtgtcccaagtccatgcgtattacaggcggggagggctga

>pCOL-1 (KC609323)

ATGGGGCAAGCACAGCTACGACTTTTCAGCCCAGCCGATGAGGCGGGTTGCTATCACGACACAGCCCGGCAGGGCTTTTTCTCGTTGCTCATGGCGACGGGCGAGGGCAGCGGCAAGAAGCAGGACAGTTACCGGCTGTCACAGATGCCCGTGGTGCTCTCCATGCTCGACCACAGCCGGGATACGTGGCTGTCTCAGGCCGAGTTCATCAAGCCAAACCGCCGTGTCGTCAATCTGGCCCGTATCGGGCTGCTGTTCGCTGACTTGGACACCTACCGCGAGCCGTGGGCGCAGGGGCGCAGCCCCGAGCAACTGGCCGCCGCTGTCATGTTCCGCTGCTACGACGAAGGCGTGCCGCCGCCGTCGATCCTCGTTTTCTCTGGCCGTGGCGTGCAAGCAAAGTGGCTGCTGGATGGCACCTTGCCGCGTCAGGCGCTGCCACGCTGGAATGCCTGCCAGCGTTACCTGATCGACCGTCTGGCCGGGCTGGGCGCTGATCCAGCGGCCAAGGATGCAAGCCGCGTGCTGCGGCTGGTCAATACGGTGAACAGCAAGAGCGGCGAGGTTTGCCGCGTCATCCACGTTGAGCAAGGCCCGGACGGCGAGCCGATCCGGTACAACTTCGAGTATCTGGCCGAGGCGCTACTGCCGGTGGCCCGCTGGGACATCGAGGCCGACCGCAAGGCCCGCGCCGACCGTCGCCAGTTCAAGCTGCTGCCGGGCGGCCAAACCGGCAACCTGCGCACGCTCAACGGGCGGCAACTGGCGTGGGATCGTCTGGAGGACTTGCGCACGCTGGCCGCGCTGCGCGGCGGCGTGGCCGAGGGCGAGCGGATGCAGCACCTGTTTTGGCGGCTGAATTTCCTGCTGCTGTCAGGTGCGACGCACACCGGCCAGATGTACCACGAGGCCGCCGCGCTGGCCCGTGAGCTTGACCCACGGTGGAACTACCGCAGCGCCGAGCTTATGACGCTGTACGCCAAGGCCAAGGCTCACGAAGCCGGGGAAAAGGTGGAGTTCGGCGGCAAGCAGTTTGCGCCGCTCTACACGCCCAAGAACGACACGCTTATCAGCCTGTTTCACATCACCGACGACGAGCAGCGCAAGCTGCGCACGCTCATCAGCCGGGACATGGCCGCAGAGCGCCACAGCGAGCGCGAGAAAGCCCGCAGACGTGCCGCTGGGGCTGTCGATCGTGCTTCCTATCTGGAAGCAGCCAGCGCCAAGCAGGCGCAGGCTTTGGCCCTCAAGGCGCAGGGTCTGAGCGTGCGGGCCATTGCTGCACAGATGGGCATTAGCAAGACCGCTGCCGGGCGCTACATCGCAGAGCCGGGAGAGTGTCCCAAGTCCATGCGTATTACAGGCGGGGAGGGCTGA

>pWP3-S18-CRE-02_5 (AP022010)

atggggcaagcacagctacgacttttcagcccagccgatgaggcgggttgctatcacgacacagcccgacagggctttttctcgttgctcatggcgacgggcgagggcagcggcaagaagcaggacagttaccggctgtcacagatgcccgtggtgctctccatgctcgaccacagccgggatacgtggctgtctcaggccgagttcatcaagccaaaccgccgtgtcgtcaatctggcccgtatcgggctgctgttcgctgacttggacacctaccgcgagccgtgggcgcaggggcgcagccccgagcaactggccgccgctgtcatgttccgctgctacgacgaaggcgtgccgccgccgtcgatcctcgttttctctggccgtggcgtgcaagcaaagtggctgctggatggcaccttgccgcgtcaggcgctgccacgctggaatgcctgccagcgttacctgatcgaccgtctggccgggctgggcgctgatccagcggccaaggatgcaagccgcgtgctgcggctggtcaatacggtgaacagcaagagcggcgaggtttgccgcgtcatccacgttgagcaaggcccggacggcgagccgatccggtacaacttcgagtatctggccgaggcgctgctgccggtggcccgctgggacatcgaggccgaccgcaaggcccgcgccgaccgtcgccagttcaagctgctgccgggcggccaaaccggcaacctgcgcacgctcaacgggcggcaactggcgtgggatcgtctggaggacttgcgcacgctggccgcgctgcgcggcggcgtggccgagggcgagcggatgcagcacctgttttggcggctgaatttcctgctgctgtcaggtgcgacgcacaccggccagatgtaccacgaggccgccgcgctggcccgtgagcttgacccacggtggaactaccgcagcgccgagcttatgacgctgtacgccaaggccaaggcccacgaagccggggaaaaggtggagttcggcggcaagcagtttgcgccgctctacacgcccaagaacgacacgcttatcagcctgtttcacatctccgacgacgagcagcgcaagctgcgcacgctcatcagccgggacatggccgcagagcgccacaggaagcgtgacgaggcccgcaggcgggccgctggggctgtcgatcgtgcgacctatgaggccaactccgcgagccgtcagaagccgtgggaagccttgggcatgagccgggcaagctggtatcgagcaggcaagccaacgccagcggttgagacaagtccctgcgtattacaggccgctgcgggtgattcagatgcgtga

>pRHBSTW-00464_5 (CP056487)

atggggcaagcacagctacgacttttcagcccagccgatgaggcgggttgctatcacgacacagcccggcagggctttttctcgttgctcatggcgacgggcgagggcagcggcaagaagcaggacagttaccggctgtcacagatgcccgtggtgctctccatgctcgaccacagcagggatacgtggctgtctcaggccgagttcatcaagccaaaccgccgtgtcgtcaatctggcccgtatcgggctgctgttcgctgacttggacacctaccgcgagccgtgggcgcaggggcgcagccccgagcaactggccgccgctgtcatgttccgctgctacgacgaaggcgtgccgccgccgtcgatcctcgttttctctggccgtggcgtgcaagcaaagtggctgctggatggcaccttgccgcgtcaggcgctgccacgctggaatgcctgccagcgttacctgatcgaccgtctggccgggctgggcgctgatccagcggccaaggatgcaagccgcgtgctgcggctggtcaatacggtgaacagcaagagcggcgaggtttgccgcgtcatccacgttgagcaaggcccggacggcgagccgatccggtacaacttcgagtatctggccgaggcgctactgccggtggcccgctgggacatcgaggccgaccgcaaggcccgcgccgaccgtcgccagttcaagctgctgccgggcggccaaaccggcaacctgcgcacgctcaacgggcggcaactggcgtgggatcgtctggaggacttgcgcacgctggccgcgctgcgcggcggcgtggccgagggcgagcggatgcagcacctgttttggcggctgaatttcctgctgctgtcaggtgcgacgcacaccggccagatgtaccacgaggccgccgcgctggcccgtgagcttgacccacggtggaactaccgcagcgccgagcttatgacgctgtacgccaaggccaaggcccacgaagccggggaaaaggtggagttcggcggcaagcagtttgcgccgctctacacgcccaagaacgacacgcttatcagcctgtttcacatcaccgacgacgagcagcgcaagctgcgcacgctcatcagccgggacatggccgcagagcgccacagcgagcgcgagaaagcccgcagacgtgccgctggggctgtcgatcgtgcttcctatctggaagcagccagcgccaagcaggcgcaggctttggccctcaaggcgcagggtctgagcgtgcgggccattgctgcacagatgggcattagcaagaccgctgccgggcgctacatcgcagagccgggagagtgtcccaagtccatgcgtattacaggcggggagggctga

>pRSB105 (DQ839391)

ATGGGGCAAGCACAGCTACGACTTTTCAGCCCAGCCGATGAGGCGGGTTGCTATCACGACACAGCCCGGCAGGGCTTTTTCTCGTTGCTCATGGCGACGGGCGAGGGCAGCGGCAAGAAGCAGGACAGTTACCGGCTGTCACAGATGCCCGTGGTGCTCTCCATGCTCGACCACAGCCGGGATACGTGGCTGTCTCAGGCCGAGTTCATCAAGCCAAACCGCCGTGTCGTCAATCTGGCCCGTATCGGGCTGCTGTTCGCTGACTTGGACACCTACCGCGAGCCGTGGGCGCAGGGGCGCAGCCCCGAGCAACTGGCCGCCGCTGTCATGTTCCGCTGCTACGACGAAGGCGTGCCGCCGCCGTCGATCCTCGTTTTCTCTGGCCGTGGCGTGCAAGCAAAGTGGCTGCTGGATGGCACCTTGCCGCGTCAGGCGCTGCCACGCTGGAATGCCTGCCAGCGTTACCTGATCGACCGTCTGGCCGGGCTGGGCGCTGATCCAGCGGCCAAGGATGCAAGCCGCGTGCTGCGGCTGGTCAATACGGTGAACAGCAAGAGCGGCGAGGTTTGCCGCGTCATCCACGTTGAGCAAGGCCCGGACGGCGAGCCGATCCGGTACAACTTCGAGTATCTGGCCGAGGCGCTACTGCCGGTGGCCCGCTGGGACATCGAGGCCGACCGCAAGGCCCGCGCCGACCGTCGCCAGTTCAAGCTGCTGCCGGGCGGCCAAACCGGCAACCTGCGCACGCTCAACGGGCGGCAACTGGCGTGGGATCGTCTGGAGGACTTGCGCACGCTGGCCGCGCTGCGCGGCGGCGTGGCCGAGGGCGAGCGGATGCAGCACCTGTTTTGGCGGCTGAATTTCCTGCTGCTGTCAGGTGCGACGCACACCGGCCAGATGTACCACGAGGCCGCCGCGCTGGCCCGTGAGCTTGACCCACGGTGGAACTACCGCAGCGCCGAGCTTATGACGCTGTACGCCAAGGCCAAGGCCCACGAAGCCGGGGAAAAGGTGGAGTTCGGCGGCAAGCAGTTTGCGCCGCTCTACACGCCCAAGAACGACACGCTTATCAGCCTGTTTCACATCACCGACGACGAGCAGCGCAAGCTGCGCACGCTCATCAGCCGGGACATGGCCGCAGAGCGCCACAGCGAGCGCGAGAAAGCCCGCAGACGTGCCGCTGGGGCTGTCGATCGTGCTTCCTATCTGGAAGCAGCCAGCGCCAAGCAGGCGCAGGCTTTGGCCCTCAAGGCGCAGGGTCTGAGCGTGCGGGCCATTGCTGCACAGATGGGCATTAGCAAGACCGCTGCCGGGCGCTACATCGCAGAGCCGGGAGAGTGTCCCAAGTCCATGCGTATTACAGGCGGGGAGGGCTGA

>pLNU-11 (KX863568)

atggggcaagcacagctacgacttttcagcccagccgatgaggcgggttgctatcacgacacagcccggcagggctttttctcgttgctcatggcgacgggcgagggcagcggcaagaagcaggacagttaccggctgtcacagatgcccgtggtgctctccatgctcgaccacagccgggatacgtggctgtctcaggccgagttcatcaagccaaaccgccgtgtcgtcaatctggcccgtatcgggctgctgttcgctgacttggacacctaccgcgagccgtgggcgcaggggcgcagccccgagcaactggccgccgctgtcatgttccgctgctacgacgaaggcgtgccgccgccgtcgatcctcgttttctctggccgtggcgtgcaagcaaagtggctgctggatggcaccttgccgcgtcaggcgctgccacgctggaatgcctgccagcgttacctgaccgaccgtctggccgggctgggcgctgatccagcggccaaggatgcaagccgcgtgctgcggctggtcaatacggtgaacagcaagagcggcgaggtttgccgcgtcatccacgttgagcaaggcccggacggcgagccgatccggtacaacttcgagtatctggccgaggcgctactgccggtggcccgctgggacatcgaggccgaccgcaaggcccgcgccgaccgtcgccagttcaagctgctgccgggcggccaaaccggcaacctgcgcacgctcaacgggcggcaactggcgtgggatcgtctggaggacttgcgcacgctggccgcgctgcgcggcggcgtggccgagggcgagcggatgcagcacctgttttggcggctgaatttcctgctgctgtcaggtgcgacgcacaccggccagatgtaccacgaggccgccgcgctggcccgtgagcttgacccacggtggaactaccgcagcgccgagcttatgacgctgtacgccaaggccaaggctcacgaagccggggaaaaggtggagttcggcggcaagcagtttgcgccgctctacacgcccaagaacgacacgcttatcagcctgtttcacatcaccgacgacgagcagcgcaagctgcgcacgctcatcagccgggacatggcgaccgagcgccgccgcgaccgcgacagaaagcgcgacgaagcccgcaggcgtgccgctggggccgtcgatcgtgcgacctatgaggccaattccgcgagccgtcagaagccgtgggaatccttgggcatgagccgggcaagctggtatcgagcaggtaagccgatgccagcctgtgagacaggttcctcccctattacagcctccaaggtggagcgcaaagcgtga

>pKRA-GES-5 (MN436715)

atggggcaagcacagctacgacttttcagcccagccgatgaggcgggttgctatcacgacacagcccggcagggctttttctcgttgctcatggcgacgggcgagggcagcggcaagaagcaggacagttaccggctgtcacagatgcccgtggtgctttccatgctcgaccacagccgggatacgtggctgtctcaggccgagttcatcaagccaaaccgccgtgtcgtcaatctggcccgtatcgggctgctgttcgctgacttggacccctaccgcgagccgtgggcgcaggggcgcagccccgagcaactggccgccgctgtcatgttccgctgctacgacgaaggcgtgccgccgccgtcgatcctcgttttctctggccgtggcgtgcaagcaaagtggctgctggatggcaccttgccgcgtcaggcgctgccacgctggaatgcctgccagcgttacctgatcgaccgtctggccgggctgggcgctgatccagcggccaaggatgcaagccgcgtgctgcggctggtcaatacggtgaacagcaagggcggcgaggtttgccgcgtcatccacgttgagcaaggcccggacggcgagccgatccggtacaacttcgagtatctggccgaggcgctgctgccggtggcccgctgggacatcgaggccgaccgcaaggcccgcgccgaccgtcgccagttcaagctgctgccgggcggccaaaccggcaacctgcgcacgctcaacgggcggcaactggcgtgggatcgtctggaggacttgcgcacgctggccgcgctgcgcggcggcgtggccgagggcgagcggatgcagcacctgttttggcggctgaatttcctgctgctgtcaggtgcgacgcacaccggccagatgtaccacgaggccgccgcgctggcccgtgagcttgacccacggtggaactaccgcagcgccgagcttatgacgctgtacgccaaggccaaggcccacgaagccggggaaaaggtggagttcggcggcaagcagtttgcgccgctctacacgcccaagaacgacacgcttatcagcctgtttcacatctccgacgacgagcagcgcaagctgcgcacgctcatcagccgggacatggcgaccgagcgccgccgcgaccgcgacagaaagcgcgacgaagcccgcaggcgtgccgctggggccgtcgatcgtgcgacctatgaggccaattccgcgagccgtcagaagccgtgggaatccttgggcatgagccgggcaagctggtatcgagcaggtaagccgatgccagcctgtgagacaggttcctcccctattacagcctccaaggtggagcgcaaagcgtga

>2 (LS998784)

ATGGGGCAAGCACAGCTACGACTTTTCAGCCCAGCCGATGAGGCGGGTTGCTATCACGACACAGCCCGGCAGGGCTTTTTCTCGTTGCTCATGGCGACGGGCGAGGGCAGCGGCAAGAAGCAGGACAGTTACCGGCTGTCACAGATGCCCGTGGTGCTCTCCATGCTCGACCACAGCCGGGATACGTGGCTGTCTCAGGCCGAGTTCATCAAGCCAAACCGCCGTGTCGTCAATCTGGCCCGTATCGGGCTGCTGTTCGCTGACTTGGACACCTACCGCGAGCCGTGGGCGCAGGGGCGCAGCCCCGAGCAACTGGCCGCCGCTGTCATGTTCCGCTGCTACGACGAAGGCGTGCCGCCGCCGTCGATCCTCGTTTTCTCTGGCCGTGGCGTGCAAGCAAAGTGGCTGCTGGATGGCACCTTGCCGCGTCAGGCGCTGCCACGCTGGAATGCCTGCCAGCGTTACCTGATCGACCGTCTGGCCGGGCTGGGCGCTGATCCAGCGGCCAAGGATGCAAGCCGCGTGCTGCGGCTGGTCAATACGGTGAACAGCAAGAGCGGCGAGGTTTGCCGCGTCATCCACGTTGAGCAAGGCCCGGACGGCGAGCCGATCCGGTACAACTTCGAGTATCTGGCCGAGGCGCTACTGCCGGTGGCCCGCTGGGACATCGAGGCCGACCGCAAGGCCCGCGCCGACCGTCGCCAGTTCAAGCTGCTGCCGGGCGGCCAAACCGGCAACCTGCGCACGCTCAACGGGCGGCAACTGGCGTGGGATCGTCTGGAGGACTTGCGCACGCTGGCCGCGCTGCGCGGCGGCGTGGCCGAGGGCGAGCGGATGCAGCACCTGTTTTGGCGGCTGAATTTCCTGCTGCTGTCAGGTGCGACGCACACCGGCCAGATGTACCACGAGGCCGCCGCGCTGGCCCGTGAGCTTGACCCACGGTGGAACTACCGCAGCGCCGAGCTTATGACGCTGTACGCCAAGGCCAAGGCCCACGAAGCCGGGGAAAAGGTGGAGTTCGGCGGCAAGCAGTTTGCGCCGCTCTACACGCCCAAGAACGACACGCTTATCAGCCTGTTTCACATCTCCGACGACGAGCAGCGCAAGCTGCGCACGCTCATCAGCCGGGACATGGCGACCGAGCGCCGCCGCGACCGCGACAGAAAGCGCGACGAAGCCCGCAGGCGTGCCGCTGGGGCCGTCGATCGTGCGACCTATGAGGCCAATTCCGCGAGCCGTCAGAAGCCGTGGGAATCCTTGGGCATGAGCCGGGCAAGCTGGTATCGAGCAGGTAAGCCGATGCCAGCCTGTGAGACAGGTTCCTCCCCTATTACAGCCTCCAAGGTGGAGCGCAAAGCGTGA

>Rms149 (AJ877225)

atggggcaagcacagctacgacttttcagcccagccgatgaggcgggttgctatcacgacacagcccggcagggctttttctcgttgctcatggcgacgggcgagggcagcggcaagaagcaggacagttaccggctgtcacagatgcccgtggtgctctccatgctcgaccacagccgggatacgtggctgtctcaggccgagttcatcaagccaaaccgccgtgtcgtcaatctggcccgtatcgggctgctgttcgctgacttggacacctaccgcgagccgtgggcgcaggggcgcagccccgagcaactggccgccgctgtcatgttccgctgctacgacgaaggcgtgccgccgccgtcgatcctcgttttctctggccgtggcgtgcaagcaaagtggctgctggatggcaccttgccgcgtcaggcgctgccacgctggaatgcctgccagcgttacctgatcgaccgtctggccgggctgggcgctgatccagcggccaaggatgcaagccgcgtgctgcggctggtcaatacggtgaacagcaagagcggtgaggtttgccgcgtcatccacgttgagcaaggcccggacggcgagccgatccggtacaacttcgagtatctggccgaggcgctactgccggtggcccgctgggacatcgaggccgaccgcaaggcccgcgccgaccgtcgccagttcaagctgctgccgggcggccaaaccggcaacctgcgcacgctcaacgggcggcaactggcgtgggatcgtctggaggacttgcgcacgctggccgcgctgcgcggcggcgtggccgagggcgagcggatgcagcacctgttttggcggctgaatttcctgctgctgtcaggtgcgacgcacaccggccagatgtaccacgaggccgccgcgctggcccgtgagcttgacccacggtggaactaccgcagcgccgagcttatgacgctgtacgccaaggccaaggcccacgaagccggggaaaaggtggagttcggcggcaagcagtttgcgccgctctacacgcccaagaacgacacgcttatcagcctgtttcacatctccgacgacgagcagcgcaagctgcgcacgctcatcagccgggacatggcgaccgagcgccgccgcgaccgcgacagaaagcgcgacgaagcccgcaggcgtgccgctggggccgtcgatcgtgcgacctatgaggccaattccgcgagccgtcagaagccgtgggaatccttgggcatgagccgggcaagctggtatcgagcaggtaagccgatgccagcctgtgagacaggttcctcccctattacagcctccaaggtggagcgcaaagcgtga

>pCfr-33795cz (MG558000)

atgggacaggcacagctacgacttttcagcccagccgatgaggcgggttgctatcacgacacagcccggcagggctttttctcgttgctcatggcgacgggcgagggcagcggcaagaagcaggacagttaccggctgtcacagatgcccgtggtgctctccatgctcgaccacagccgggatacctggctgtctcaggccgagttcatcaagccaaaccgccgtgtcgtcaatctggcccgtatcgggctgctgttcgccgatctggacacctaccgcgagccgtgggcgcaggggcgcagccccgagcaactggccgccgctgtcatgttccgctgctacgacgaaggcgtgccgccgccgtcgatcctcgttttctctggccgtggcgtgcaagcaaagtggctgctggatggcacgttgccgcgtcaggcgctgccacgctggaatgcctgccagcgttacctgatcgaccgtctggccgggctgggcgctgatccagcggccaaggatgcaagccgcgtgctgcggctggtcaatacggtgaacagcaagagcggcgaggtttgccgcgtcatccacgttgagcaaggcccggacggcgagccgatccgctacaacttcgagtatctggccgaggcgctgctgccggtggcccgctgggacatcgaggccgaccgcaaggcccgcgccgaccgtcgccagttcaagctgctgccgggcggccaaaccggcaacctgcgcacgctcaacgggcggcaactggcgtgggatcgtctggaggacttgcgcacgctggccgcgctgcgcggcggcgtggccgagggcgagcggatgcagcacctgttttggcggctgaatttcctcctgctgtcaggtgcgacgcacaccggccagatgtaccacgaggccgccgcgctggcccgtgagcttgacccacggtggaactaccgcagcgccgagcttatgacgctatacgccaaggcgaaggcccacgaagccggggaaaaggtggagttcggcggcaagcagtttgcgccgctctacacgcccaagaacgacacgcttatcagcctgtttcacatcaccgacgacgagcagcgcaagctgcgcacgctcatcagtcgggacatggcgaccgagcgccgccgcgaccgcgacagaaagcgcgacgaagcccgcaggcgtgccgctggggctgtcgatcgtgcgacctatgaggccaattccgcgagccgtcagaagccgtgggaatccttgggcatgagccgggcaagctggtatcgagcaggtaagccgatgccagcttgtgagacaggttcctcccctattacagccgccaaggtggagcgcaaagcgtga

>SDENCHOLpc (LT837806)

atggggcaagcacagctacgacttttcagcccagccgatgaggcgggttgctatcacgacacagcccggcagggctttttctcgttgctcatggcgacgggcgagggcagcggcaagaagcaggatagttaccggctgtcacagatgcccgtggtgctctccatgctcgaccacagccgggatacctggctgtctcaggccgagttcatcaagccaaaccgccgtgtcgtcaatctggcccgtatcgggctgctgttcgccgatctggacacctaccgcgagccgtgggcgcaggggcgcagccccgagcaactggccgccgctgtcatgttccgctgctacgacgaaggcgtgccgccgccgtcgatcctcgttttctctggccgtggcgtgcaagcaaagtggctgctggatggcaccttgccgcgtcaggcgctgccacgctggaatgcctgccagcgttacctgatcgaccgtctggccgggctgggcgctgatccagcggccaaggatgcaagccgcgtgctgcggctggtcaatacggtgaacagcaagagcggcgaggtttgccgcgtcatccacgttgagcaaggcccggacggcgagccgatccggtacaacttcgagtatctggccgaggcgctgctgccggtggcccgctgggacatcgaggccgaccgcaaggcccgcgccgaccgtcgccagttcaagctgctgccgggcggccaaaccggcaacctgcgcacgctcaacgggcggcaactggcgtgggatcgtctggaggacttgcgcacgctggccgcgctgcgcggcggcgtggccgaaggcgagcggatgcagcacctgttttggcggctgaacttcctgctgctgtccggtgcgacgcacacgggccagatgtaccacgaggccgccgcgctggcccgtgagcttgacccacggtggaactaccgcagcagcgaacttatgacgctgtacgccaaggcgaaggcccacgaagccggggaaaaggtggagttcggcggcaagcagtttgcgccgctctacacgccaaagaacgacacgcttatcagcctgtttcacatcaccgacgacgagcagcgcaagctgcgcacgctcatcagccgggacatggcaaaggaacgcgacagggagcgccacacggcccgcaggcgtgccgcgggggctgtcgatcgtgcggcctatctggaagcagccagcgccaagcaggcgcaggctttggccctcaaggcgcagggtctgagcgtgcgggccattgctgcacaaatgggggtttctgtcggcgctgtgtctggctacctcaaggcggaaagaggcgttcaaagtccgtccgtattacaggcgcagggagccgccgatgcgtga

>pNY5520-KPC (CP096939)

ATGGGGCAAGCACAGCTACGACTTTTCAGCCCAGCCGATGAGGCGGGTTGCTATCACGACACAGCCCGACAGGGCTTTTTCTCGTTGCTCATGGCGACGGGCGAGGGCAGCGGCAAGAAGCAGGACAGTTACCGGCTGTCACAGATGCCCGTGGTGCTCTCCATGCTCGACCACAGCCGGGATACGTGGCTGTCTCAGGCCGAGTTCATCAAGCCCAATCGCCGCGTGGTCAACTTGGCCCGCATCGGCTTGCTGTTCGCCGATCTGGACACCTACCGCGAGCCGTGGGCGCAGGGGCGCAGCCCCGAGCAACTGGCCGCCGCTGTCATGTTCCGCTGCTACGACGAAGGCGTGCCGCCGCCGTCGATCCTCGTTTTCTCTGGCCGTGGCGTGCAAGCAAAGTGGCTGCTGGATGGCACCTTGCCGCGTCAGGCGCTGCCACGCTGGAATGCCTGCCAGCGTTACCTGATCGACCGTCTGGCCGGGCTGGGCGCTGATCCAGCGGCCAAGGATGCAAGCCGCGTGCTGCGGCTGGTCAATACGGTGAACAGCAAGAGCGGCGAGGTTTGCCGCGTCATCCACGTTGAGCAAGGCCCGGACGGCGAGCCGATCCGGTACAACTTCGAGTATCTGGCCGAGGCGCTACTGCCGGTGGCCCGCTGGGACATCGAGGCCGACCGCAAGGCCCGCGCCGACCGTCGCCAGTTCAAGCTGCTGCCGGGCGGCCAAACCGGCAACCTGCGCACGCTCAACGGGCGGCAACTGGCGTGGGATCGTCTGGAGGACTTGCGCACGCTGGCCGCGCTGCGCGGCGGCGTGGCCGAGGGCGAGCGGATGCAGCACCTGTTTTGGCGGCTGAATTTCCTGCTGCTGTCAGGTGCGACGCACACCGGCCAGATGTACCACGAGGCCGCCGCGCTGGCCCGTGAGCTTGACCCACGGTGGAACTACCGCAGCGCCGAGCTTATGACGCTGTACGCCAAGGCCAAGGCTCACGAAGCTGGGGAAACGGTGGAGTTCGGCGGCAAGCAGTTTGCGCCGCTCTACACGCCCAAGAACGACACGCTTATCAGCCTGTTTCACATCACCGACGACGAGCAGCGCAAGCTGCGCACGCTCATCAGCCGGGACATGGCGACCGAGCGCCGCCGCGACCGAGACAGAAAGCGCGACGAAGCCCGCAGGCGTGCCGCTGGGGCCGTCGATCGTGCGACCTATGAGGCCAATTCCGCGAGCCGTCAGAAGCCGTGGGAATCCTTGGGCATGAGCCGGGCAAGCTGGTATCGAGCAGGTAAGCCGATGCCAGCCTGTGAGACAGGTTCCTCCCCTATTACAGCCGCCAAGGTGGAGCGCAAAGCGTGA

>p9.2 (MG228256)

atgggacaggcacagctacgacttttcagcccagccgatgaggcgggttgctatcacgacacagcccggcagggctttttctcgttgctcatggcgacgggcgagggcagcggcaagaagcaggacagttaccggctgtcacagatgcccgtggtgctctccatgctcgaccacagccgggatacctggctgtctcaggctgagttcatcaagcccaatcgccgcgtggtcaacttggcccgcatcggcttgctgttcgccgatctggacacctaccgcgagccgtgggcgcaggggcgcagccccgagcaactggccgccgctgtcatgttccgctgctacgacgaaggcgtgccgccgccgtcgatcctcgttttctctggccgtggcgtgcaagcaaagtggctgctggatggcaccttgccgcgtcaggcgctgccacgctggaatgcctgccagcgttacctgatcgaccgtctggccgggctgggcgctgatccagcggccaaggatgcaagccgcgtgctgcggctggtcaatacggtgaacagcaagagcggcgaggtttgccgcgtcatccacgttgagcaaggcccggacggcgagccgatccggtacaacttcgagtatctggccgaggcgctgctgccggtggcccgctgggacatcgaggccgaccgcaaggcccgcgccgaccgtcgccagttcaagctgctgccgggcggccaaaccggcaacctgcgcacgctcaacgggcggcaactggcgtgggatcgtctggaggacttgcgcacgctggccgcgctgcgcggcggcgtggccgagggcgagcggatgcagcacctgttttggcggctgaatttcctgctgctgtcaggtgcgacgcacaccggccagatgtaccacgaggccgccgcgctggcccgtgagcttgacccacggtggaactaccgcagcgccgagcttatgacgctgtacgccaaggccaaggcccacgaagccggggaaaaggtggagttcggcggcaagcagtttgcgccgctctacacgcccaagaacgacacgcttatcagcctgtttcacatctccgacgacgagcagcgcaagctgcgcacgctcatcagccgggacatggcgaccgagcgccgccgcgaccgcgacagaaagcgcgacgaagcccgcaggcgtgccgctggggccgtcgatcgtgcgacctatgaggccaattccgcgagccgtcagaagccgtgggaatccttgggcatgagccgggcaagctggtatcgagcaggtaagccgatgccagcctgtgagacaggttcctcccctattacagccgccaaggtggagcgcaaagcgtga

>pBM527-3 (CP041049)

atgggacaggcacagctacgacttttcagcccagccgatgaggcgggttgctatcacgacacagcccggcagggctttttctcgttgctcatggcgacgggcgagggcagcggcaagaagcaggacagttaccggctgtcacagatgcccgtggtgctctccatgctcgaccacagccgggatacctggctgtctcaggctgagttcatcaagcccaatcgccgcgtggtcaacttggcccgcatcggcttgctgttcgccgatctggacacctaccgcgagccgtgggcgcaggggcgcagccccgagcaactggccgccgctgtcatgttccgctgctacgacgaaggcgtgccgccgccgtcgatcctcgttttctctggccgtggcgtgcaagcaaagtggctgctggatggcaccttgccgcgtcaggcgctgccacgctggaatgcctgccagcgttacctgatcgaccgtctggccgggctgggcgctgatccagcggccaaggatgcaagccgcgtgctccggctggtcaatacggtgaacagcaagagcggcgaggtttgccgcgtcatccacgttgagcaaggcccggacggcgagccgatccggtacaacttcgagtatctggccgaggcgctgctgccggtggcccgctgggacatcgaggccgaccgcaaggcccgcgccgaccgtcgccagttcaagctgctgccgggcggccaaaccggcaacctgcgcacgctcaacgggcggcaactggcgtgggatcgtctggaggacttgcgcacgctggccgcgctgcgcggcggcgtggccgagggcgagcggatgcagcacctgttttggcggctgaatttcctgctgctgtcaggtgcgacgcacaccggccagatgtaccacgaggccgccgcgctggcccgtgagcttgacccacggtggaactaccgcagcgccgagcttatgacgctgtacgccaaggccaaggcccacgaagccggggaaaaggtggagttcggcggcaagcagtttgcgccgctctacacgcccaagaacgacacgcttatcagcctgtttcacatcaccgacgacgagcagcgcaagctgcgcacgctcatcagccgggacatggcgaccgagcgccacaggaagcgtgacgaggcccgcaggcgggccgctggggctgtcgatcgtgcgacctatgaggccaactccgcgagccgtcagaagccgtgggaagccttgggcatgagccgggcaagctggtatcgagcaggcaagccaacgccagcggttgagacaagtccctgcgtattacaggccgctgcgggtgattcagatgcgtga

>pPS-MS-17-188-3 (CP027855)

atggggcaagcacagctacgacttttcagcccagccgatgaggcgggttgctatcacgacacagcccggcagggctttttctcgttgctcatggcgacgggcgagggcagcggcaagaagcaggacagttaccggctgtcacagatgcccgtggtgctctccatgctcgaccacagccgggatacctggctgtctcaggctgagttcatcaagcccaatcgccgcgtggtcaacttggcccgcatcggcttgctgttcgccgatctggacacctaccgcgagccgtgggcgcaggggcgcagccccgagcaactggccgccgctgtcatgttccgctgctacgacgaaggcgtgccgccgccgtcgatcctcgttttctctggccgtggcgtgcaagcaaagtggctgctggatggcaccttgccgcgtcaggcgctgccacgctggaatgcctgccagcgttacctgatcgaccgtctggccgggctgggcgctgatccagcggccaaggatgcaagccgcgtgctccggctggtcaatacggtgaacagcaagagcggcgaggtttgccgcgtcatccacgttgagctaggcccggacggcgagccgatccggtacaacttcgagtatctggccgaggcgctgctgccggtggcccgctgggacatcgaggccgaccgcaaggcccgcgccgaccgtcgccagttcaagctgctgccgggcggccaaaccggcaacctgcgcacgctcaacgggcggcaactggcgtgggatcgcctggaggacttgcgcacgctggccgcgctgcgcggcggcgtggccgagggtgagcggatgcagcacctgttttggcggctgaatttcctgctgctgtcaggtgcgacgcacaccggccagatgtaccacgaggccgccgcgctggcccgtgagcttgacccacggtggaactaccgcagcgccgagcttatgacgctgtacgccaaggccaaggcccacgaagccggggaaaaggtggagttcggcggcaagcagtttgcgccgctctacacgcccaagaacgacacgcttatcagcctgtttcacatcaccgacgacgagcagcgcaagctgcgcacgctcatcagccgggacatggccgcagagcgccacagcgagcgcgagaaagcccgcagacgtgccgctggggctgtcgatcgtgcttcctatctggaagcagccagcgccaagcaggcgcaggctttggccctcaaggcgcagggtctgagcgtgcgggccattgctgcacagatgggcattagcaagaccgctgccgggcgctacatcgcagagccgggagagtgtcccaagtccatgcgtattactaatggcgaagcctacgcccggcgcgtagcgcctgcctttgaatag

>pRIVM_C014947_3 (MT560066)

ATGGGACAGGCACAGCTACGACTTTTCAGCCCAGCCGATGAGGCGGGTTGCTATCACGACACAGCCCGGCAGGGCTTTTTCTCGTTGCTCATGGCGACGGGCGAGGGCAGCGGCAAGAAGCAGGACAGTTACCGGCTGTCACAGATGCCCGTGGTGCTCTCCATGCTCGACCACAGCCGGGATACCTGGCTGTCTCAGGCTGAGTTCATCAAGCCCAATCGCCGCGTGGTCAACTTGGCCCGCATCGGCTTGCTGTTCGCCGATCTGGACACCTACCGCGAGCCGTGGGCGCAGGGGCGCAGCCCCGAGCAACTGGCCGCCGCTGTCATGTTCCGCTGCTACGACGAAGGCGTGCCGCCGCCGTCGATCCTCGTTTTCTCTGGCCGTGGCGTGCAAGCAAAGTGGCTGCTGGATGGCACCTTGCCGCGTCAGGCGCTGCCACGCTGGAATGCCTGCCAGCGTTACCTGATCGACCGTCTGGCCGGGCTGGGCGCTGATCCAGCGGCCAAGGATGCAAGCCGCGTGCTGCGGCTGGTCAATACGGTGAACAGCAAGAGCGGCGAGGTTTGCCGCGTCATCCACGTTGAGCAAGGCCCGGACGGCGAGCCGATCCGGTACAACTTCGAGTATCTGGCCGAGGCGCTACTGCCGGTGGCCCGCTGGGACATCGAGGCCGACCGCAAGGCCCGCGCCGACCGTCGCCAGTTCAAGCTGCTGCCGGGCGGCCAAACCGGCAACCTGCGCACGCTCAACGGGCGGCAACTGGCGTGGGATCGTCTGGAGGACTTGCGCACGCTGGCCGCGCTGCGCGGCGGCGTGGCCGAGGGCGAGCGGATGCAGCACCTGTTTTGGCGGCTGAATTTCCTGCTGCTGTCAGGTGCGACGCACACCGGCCAGATGTACCACGAGGCCGCCGCGCTGGCCCGTGAGCTTGACCCACGGTGGAACTACCGCAGCGCCGAGCTTATGACGCTGTACGCCAAGGCCAAGGCCCACGAAGCCGGGGAAAAGGTGGAGTTCGGCGGCAAGCAGTTTGCGCCGCTCTACACGCCCAAGAACGACACGCTTATCAGCCTGTTTCACATCTCCGACGACGAGCAGCGCAAGCTGCGCACGCTCATCAGCCGGGACATGGCCGCAGAGCGCCACAGCGAGCGCGAGAAAGCCCGCAGACGTGCCGCTGGGGCTGTCGATCGTGCTTCCTATCTGGAAGCAGCCAGCGCCAAGCAGGCGCAGGCTTTGGCCCTCAAGGCGCAGGGTCTGAGCGTGCGGGCCATTGCTGCACAGATGGGCATTAGCAAGACCGCTGCCGGGCGCTACATCGCAGAGCCGGGAGAGTGTCCCAAGTCCATGCGTATTACAGGCGGGGAGGGCTGA

>pJF-786 (KX912255)

ATGGGACAGGCACAGCTACGACTTTTCAGCCCAGCCGATGAGGCGGGTTGCTATCACGACACAGCCCGGCAGGGCTTTTTCTCGTTGCTCATGGCGACGGGCGAGGGCAGCGGCAAGAAGCAGGACAGTTACCGGCTGTCACAGATGCCCGTGGTGCTCTCCATGCTCGACCACAGCCGGGATACCTGGCTGTCTCAGGCTGAGTTCATCAAGCCCAATCGCCGCGTGGTCAACTTGGCCCGCATCGGCTTGCTGTTCGCCGATCTGGACACCTACCGCGAGCCGTGGGCGCAGGGGCGCAGCCCCGAGCAACTGGCCGCCGCTGTCATGTTCCGCTGCTACGACGAAGGCGTGCCGCCGCCGTCGATCCTCGTTTTCTCTGGCCGTGGCGTGCAAGCAAAGTGGCTGCTGGATGGCACCTTGCCGCGTCAGGCGCTGCCACGCTGGAATGCCTGCCAGCGTTACCTGATCGACCGTCTGGCCGGGCTGGGCGCTGATCCAGCGGCCAAGGATGCAAGCCGCGTGCTGCGGCTGGTCAATACGGTGAACAGCAAGAGCGGCGAGGTTTGCCGCGTCATCCACGTTGAGCAAGGCCCGGACGGCGAGCCGATCCGGTACAACTTCGAGTATCTGGCCGAGGCGCTGCTGCCGGTGGCCCGCTGGGACATCGAGGCCGACCGCAAGGCCCGCGCCGACCGTCGCCAGTTCAAGCTGCTGCCGGGCGGCCAAACCGGCAACCTGCGCACGCTCAACGGGCGGCAACTGGCGTGGGATCGTCTGGAGGACTTGCGCACGCTGGCCGCGCTGCGCGGCGGCGTGGCCGAGGGCGAGCGGATGCAGCACCTGTTTTGGCGGCTGAATTTCCTGCTGCTGTCAGGTGCGACGCACACCGGCCAGATGTACCACGAGGCCGCCGCGCTGGCCCGTGAGCTTGACCCACGGTGGAACTACCGCAGCGCCGAGCTTATGACGCTGTACGCCAAGGCCAAGGCCCACGAAGCCGGGGAAAAGGTGGAGTTCGGCGGCAAGCAGTTTGCGCCGCTCTACACGCCCAAGAACGACACGCTTATCAGCCTGTTTCACATCTCCGACGACGAGCAGCGCAAGCTGCGCACGCTCATCAGCCGGGACATGGCCGCAGAGCGCCACAGGAAGCGTGACGAGGCCCGCAGGCGGGCCGCTGGGGCTGTCGATCGTGCGACCTATGAGGCCAACTCCGCGAGCCGTCAGAAGCCGTGGGAAGCCTTGGGCATGAGCCGGGCAAGCTGGTATCGAGCAGGCAAGCCAACGCCAGCGGTTGAGACAAGTCCCTGCGTATTACAGGCCGCTGCGGGTGATTCAGATGCGTGA

>pHN21SC1505-4 (CP091085)

atgggacaggcacagctacgacttttcagcccagccgatgaggcgggttgctatcacgacacagcccggcagggctttttctcgttgctcatggcgacgggcgagggcagcggcaagaagcaggacagttaccggctgtcacagatgcccgtggtgctctccatgctcgaccacagccgggatacctggctgtctcaggctgagttcatcaagcccaatcgccgcgtggtcaacttggcccgcatcggcttgctgttcgccgatctggacacctaccgcgagccgtgggcgcaggggcgcagccccgagcaactggccgccgctgtcatgttccgctgctacgacgaaggcgtgccgccgccgtcgatcctcgttttctctggccgtggcgtgcaagcaaagtggctgctggatggcaccttgccgcgtcaggcgctgccacgctggaatgcctgccagcgttacctgatcgaccgtctggccgggctgggcgctgatccagcggccaaggatgcaagccgcgtgctgcggctggtcaatacggtgaacagcaagagcggcgaggtttgccgcgtcatccacgttgagcaaggcccggacggcgagccgatccggtacaacttcgagtatctggccgaggcgctgctgccggtggcccgctgggacatcgaggccgaccgcaaggcccgcgccgcccgtcgccagttcaagctgctgccgggcggccaaaccggcaacctgcgcacgctcaacgggcggcaactggcgtgggatcgtctggaggacttgcgcacgctggccgcgctgcgcggcggcgtggccgagggcgagcggatgcagcacctgttttggcggctgaatttcctgctgctgtcaggtgcgacgcacaccggccagatgtaccacgaggccgccgcgctggcccgtgagcttgacccacggtggaactaccgcagcgccgagcttatgacgctgtacgccaaggccaaggcccacgaagccggggaaaaggtggagttcggcggcaagcagtttgcgccgctctacacgcccaagaacgacacgcttatcagcctgtttcacatctccgacgacgagcagcgcaagctgcgcacgctcatcagccgggacatggccgcagagcgccacaggaagcgtgacgaggcccgcaggcgggccgctggggctgtcgatcgtgcgacctatgaggccaactccgcgagccgtcagaagccgtgggaagccttgggcatgagccgggcaagctggtatcgagcaggcaagccaacgccagcggttgagacaagtccctgcgtattacaggccgctgcgggtgattcagatgcgtga

>pJBIWA001_5 (CP074187)

atgggacaggcacagctacgacttttcagcccagccgatgaggcgggttgctatcacgacacagcccggcagggctttttctcgttgctcatggcgacgggcgagggcagcggcaagaagcaggacagttaccggctgtcacagatgcccgtggtgctctccatgctcgaccacagccgggatacctggctgtctcaggctgagttcatcaagcccaatcgccgcgtggtcaacttggcccgcatcggcttgctgttcgccgatctggacacctaccgcgagccgtgggcgcaggggcgcagccccgagcaactggccgccgctgtcatgttccgctgctacgacgaaggcgtgccgccgccgtcgatcctcgttttctctggccgtggcgtgcaagcaaagtggctgctggatggcaccttgccgcgtcaggcgctgccacgctggaatgcctgccagcgttacctgatcgaccgtctggccgggctgggcgctgatccagcggccaaggatgcaagccgcgtgctgcggctggtcaatacggtgaacagcaagagcggcgaggtttgccgcgtcatccacgttgagcaaggcccggacggcgagccgatccggtacaacttcgagtatctggccgaggcgctgctgccggtggcccgctgggacatcgaggccgaccgcaaggcccgcgccgaccgtcgccagttcaagctgctgccgggcggccaaaccggcaacctgcgcacgctcaacgggcggcaactggcgtgggatcgtctggaggacttgcgcacgctggccgcgctgcgcggcggcgtggccgagggcgagcggatgcagcacctgttttggcggctgaatttcctgctgctgtcaggtgcgacgcacaccggccagatgtaccacgaggccgccgcgctggcccatgagcttgacccacggtggaactaccgcagcgccgagcttatgacgctgtacgccaaggccaaggcccacgaagccggggaaaaggtggagttcggcggcaagcagtttgcgccgctctacacgcccaagaacgacacgcttatcagcctgtttcacatctccgacgacgagcagcgcaagctgcgcacgctcatcagccgggacatggccgcagagcgccacaggaagcgtgacgaggcccgcaggcgggccgctggggctgtcgatcgtgcgacctatgaggccaactccgcgagccgtcagaagccgtgggaagccttgggcatgagccgggcaagctggtatcgagcaggcaagccaacgccagcggttgagacaagtccctgcgtattacaggccgctgcgggtgattcagatgcgtga

>p12-2388.1 (CP038596)

atgggacaggcacagctacgacttttcagcccagccgatgaggcgggttgctatcacgacacagcccggcagggctttttctcgttgctcatggcgacgggcgagggcagcggcaagaagcaggacagttaccggctgtcacagatgcccgtggtgctctccatgctcgaccacagccgggatacctggctgtctcaggctgagttcatcaagcccaatcgccgcgtggtcaacttggcccgcatcggcttgctgttcgccgatctggacacctaccgcgagccgtgggcgcaggggcgcagccccgagcaactggccgccgctgtcatgttccgctgctacgacgaaggcgtgccgccgccgtcgatcctcgttttctctggccgtggcgtgcaagcaaagtggctgctggatggcaccttgccgcgtcaggcgctgccacgctggaatgcctgccagcgttacctgatcgaccgtctggccgggctgggcgctgatccagcggccaaggatgcaagccgcgtgctgcggctggtcaatacggtgaacagcaagagcggcgaggtttgccgcgtcatccacgttgagcaaggcccggacggcgagccgatccggtacaacttcgagtatctggccgaggcgctactgccggtggcccgctgggacatcgaggccgaccgcaaggcccgcgccgaccgtcgccagttcaagctgctgccgggcggccaaaccggcaacctgcgcacgctcaacgggcggcaactggcgtgggatcgtctggaggacttgcgcacgctggccgcgctgcgcggcggcgtggccgagggcgagcggatgcagcacctgttttggcggctgaatttcctgctgctgtcaggtgcgacgcacaccggccagatgtaccacgaggccgccgcgctggcccgtgagcttgacccacggtggaactaccgcagcgccgagcttatgacgctgtacgccaaggccaaggcccacgaagccggggaaaaggtggagttcggcggcaagcagtttgcgccgctctacacgcccaagaacgacacgcttatcagcctgtttcacatcaccgacgacgagcagcgcaagctgcgcacgctcatcagccgggacatggccgcagagcgccacagcgagcgcgagaaagcccgcagacgtgccgctggggctgtcgatcgtgcttcctatctggaagcagccagcgccaagcaggcgcaggctttggccctcaaggcgcagggtctgagcgtgcgggccattgctgcacagatgggcattagcaagaccgctgccgggcgctacatcgcagagccgggagagtgtcccaagtccatgcgtattacaggcggggagggctga

>p30860-KPC (MN477223)

ATGGGACAGGCACAGCTACGACTTTTCAGCCCAGCCGATGAGGCGGGTTGCTATCACGACACAGCCCGGCAGGGCTTTTTCTCGTTGCTCATGGCGACGTGCGAGGGCAGCGGCAAGAAGCAGGACAGTTACCGGCTGTCACAGATGCCCGTGGTGCTCTCCATGCTCGACCACAGCCGGGATACCTGGCTGTCTCAGGCTGAGTTCATCAAGCCCAATCGCCGCGTGGTCAACTTGGCCCGCATCGGCTTGCTGTTCGCCGATCTGGACACCTACCGCGAGCCGTGGGCGCAGGGGCGCAGCCCCGAGCAACTGGCCGCCGCTGTCATGTTCCGCTGCTACGACGAAGGCGTGCCGCCGCCGTCGATCCTCGTTTTCTCTGGCCGTGGCGTGCAAGCAAAGTGGCTGCTGGATGGCACCTTGCCGCGTCAGGCGCTGCCACGCTGGAATGCCTGCCAGCGTTACCTGATCGACCGTCTGGCCGGGCTGGGCGCTGATCCAGCGGCCAAGGATGCAAGCCGCGTGCTGCGGCTGGTCAATACGGTGAACAGCAAGAGCGGCGAGGTTTGCCGCGTCATCCACGTTGAGCAAGGCCCGGACGGCGAGCCGATCCGGTACAACTTCGAGTATCTGGCCGAGGCGCTACTGCCGGTGGCCCGCTGGGACATCGAGGCCGACCGCAAGGCCCGCGCCGACCGTCGCCAGTTCAAGCTGCTGCCGGGCGGCCAAACCGGCAACCTGCGCACGCTCAACGGGCGGCAACTGGCGTGGGATCGTCTGGAGGACTTGCGCACGCTGGCCGCGCTGCGCGGCGGCGTGGCCGAGGGCGAGCGGATGCAGCACCTGTTTTGGCGGCTGAATTTCCTGCTGCTGTCAGGTGCGACGCACACCGGCCAGATGTACCACGAGGCCGCCGCGCTGGCCCGTGAGCTTGACCCACGGTGGAACTACCGCAGCGCCGAGCTTATGACGCTGTACGCCAAGGCCAAGGCCCACGAAGCCGGGGAAAAGGTGGAGTTCGGCGGCAAGCAGTTTGCGCCGCTCTACACGCCCAAGAACGACACGCTTATCAGCCTGTTTCACATCACCGACGACGAGCAGCGCAAGCTGCGCACGCTCATCAGCCGGGACATGGCCGCAGAGCGCCACAGCGAGCGCGAGAAAGCCCGCAGACGTGCCGCTGGGGCTGTCGATCGTGCTTCCTATCTGGAAGCAGCCAGCGCCAAGCAGGCGCAGGCTTTGGCCCTCAAGGCGCAGGGTCTGAGCGTGCGGGCCATTGCTGCACAGATGGGCATTAGCAAGACCGCTGCCGGGCGCTACATCGCAGAGCCGGGAGAGTGTCCCAAGTCCATGCGTATTACAGGCGGGGAGGGCTGA

>p116965-KPC (MN539620)

ATGGGACAGGCACAGCTACGACTTTTCAGCCCAGCCGATGAGGCGGGTTGCTATCACGACACAGCCCGGCAGGGCTTTTTCTCGTTGCTCATGGCGACGTGCGAGGGCAGCGGCAAGAAGCAGGACAGTTACCGGCTGTCACAGATGCCCGTGGTGCTCTCCATGCTCGACCACAGCCGGGATACCTGGCTGTCTCAGGCTGAGTTCATCAAGCCCAATCGCCGCGTGGTCAACTTGGCCCGCATCGGCTTGCTGTTCGCCGATCTGGACACCTACCGCGAGCCGTGGGCGCAGGGGCGCAGCCCCGAGCAACTGGCCGCCGCTGTCATGTTCCGCTGCTACGACGAAGGCGTGCCGCCGCCGTCGATCCTCGTTTTCTCTGGCCGTGGCGTGCAAGCAAAGTGGCTGCTGGATGGCACCTTGCCGCGTCAGGCGCTGCCACGCTGGAATGCCTGCCAGCGTTACCTGATCGACCGTCTGGCCGGGCTGGGCGCTGATCCAGCGGCCAAGGATGCAAGCCGCGTGCTGCGGCTGGTCAATACGGTGAACAGCAAGAGCGGCGAGGTTTGCCGCGTCATCCACGTTGAGCAAGGCCCGGACGGCGAGCCGATCCGGTACAACTTCGAGTATCTGGCCGAGGCGCTACTGCCGGTGGCCCGCTGGGACATCGAGGCCGACCGCAAGGCCCGCGCCGACCGTCGCCAGTTCAAGCTGCTGCCGGGCGGCCAAACCGGCAACCTGCGCACGCTCAACGGGCGGCAACTGGCGTGGGATCGTCTGGAGGACTTGCGCACGCTGGCCGCGCTGCGCGGCGGCGTGGCCGAGGGCGAGCGGATGCAGCACCTGTTTTGGCGGCTGAATTTCCTGCTGCTGTCAGGTGCGACGCACACCGGCCAGATGTACCACGAGGCCGCCGCGCTGGCCCGTGAGCTTGACCCACGGTGGAACTACCGCAGCGCCGAGCTTATGACGCTGTACGCCAAGGCCAAGGCCCACGAAGCCGGGGAAAAGGTGGAGTTCGGCGGCAAGCAGTTTGCGCCGCTCTACACGCCCAAGAACGACACGCTTATCAGCCTGTTTCACATCACCGACGACGAGCAGCGCAAGCTGCGCACGCTCATCAGCCGGGACATGGCCGCAGAGCGCCACAGCGAGCGCGAGAAAGCCCGCAGACGTGCCGCTGGGGCTGTCGATCGTGCTTCCTATCTGGAAGCAGCCAGCGCCAAGCAGGCGCAGGCTTTGGCCCTCAAGGCGCAGGGTCTGAGCGTGCGGGCCATTGCTGCACAGATGGGCATTAGCAAGACCGCTGCCGGGCGCTACATCGCAGAGCCGGGAGAGTGTCCCAAGTCCATGCGTATTACAGGCGGGGAGGGCTGA

>pA1705-KPC (MH909348)

ATGGGACAGGCACAGCTACGACTTTTCAGCCCAGCCGATGAGGCGGGTTGCTATCACGACACAGCCCGGCAGGGCTTTTTCTCGTTGCTCATGGCGACGTGCGAGGGCAGCGGCAAGAAGCAGGACAGTTACCGGCTGTCACAGATGCCCGTGGTGCTCTCCATGCTCGACCACAGCCGGGATACCTGGCTGTCTCAGGCTGAGTTCATCAAGCCCAATCGCCGCGTGGTCAACTTGGCCCGCATCGGCTTGCTGTTCGCCGATCTGGACACCTACCGCGAGCCGTGGGCGCAGGGGCGCAGCCCCGAGCAACTGGCCGCCGCTGTCATGTTCCGCTGCTACGACGAAGGCGTGCCGCCGCCGTCGATCCTCGTTTTCTCTGGCCGTGGCGTGCAAGCAAAGTGGCTGCTGGATGGCACCTTGCCGCGTCAGGCGCTGCCACGCTGGAATGCCTGCCAGCGTTACCTGATCGACCGTCTGGCCGGGCTGGGCGCTGATCCAGCGGCCAAGGATGCAAGCCGCGTGCTGCGGCTGGTCAATACGGTGAACAGCAAGAGCGGCGAGGTTTGCCGCGTCATCCACGTTGAGCAAGGCCCGGACGGCGAGCCGATCCGGTACAACTTCGAGTATCTGGCCGAGGCGCTACTGCCGGTGGCCCGCTGGGACATCGAGGCCGACCGCAAGGCCCGCGCCGACCGTCGCCAGTTCAAGCTGCTGCCGGGCGGCCAAACCGGCAACCTGCGCACGCTCAACGGGCGGCAACTGGCGTGGGATCGTCTGGAGGACTTGCGCACGCTGGCCGCGCTGCGCGGCGGCGTGGCCGAGGGCGAGCGGATGCAGCACCTGTTTTGGCGGCTGAATTTCCTGCTGCTGTCAGGTGCGACGCACACCGGCCAGATGTACCACGAGGCCGCCGCGCTGGCCCGTGAGCTTGACCCACGGTGGAACTACCGCAGCGCCGAGCTTATGACGCTGTACGCCAAGGCCAAGGCCCACGAAGCCGGGGAAAAGGTGGAGTTCGGCGGCAAGCAGTTTGCGCCGCTCTACACGCCCAAGAACGACACGCTTATCAGCCTGTTTCACATCACCGACGACGAGCAGCGCAAGCTGCGCACGCTCATCAGCCGGGACATGGCCGCAGAGCGCCACAGCGAGCGCGAGAAAGCCCGCAGACGTGCCGCTGGGGCTGTCGATCGTGCTTCCTATCTGGAAGCAGCCAGCGCCAAGCAGGCGCAGGCTTTGGCCCTCAAGGCGCAGGGTCTGAGCGTGCGGGCCATTGCTGCACAGATGGGCATTAGCAAGACCGCTGCCGGGCGCTACATCGCAGAGCCGGGAGAGTGTCCCAAGTCCATGCGTATTACAGGCGGGGAGGGCTGA

>pA1706-KPC (MH909350)

ATGGGACAGGCACAGCTACGACTTTTCAGCCCAGCCGATGAGGCGGGTTGCTATCACGACACAGCCCGGCAGGGCTTTTTCTCGTTGCTCATGGCGACGTGCGAGGGCAGCGGCAAGAAGCAGGACAGTTACCGGCTGTCACAGATGCCCGTGGTGCTCTCCATGCTCGACCACAGCCGGGATACCTGGCTGTCTCAGGCTGAGTTCATCAAGCCCAATCGCCGCGTGGTCAACTTGGCCCGCATCGGCTTGCTGTTCGCCGATCTGGACACCTACCGCGAGCCGTGGGCGCAGGGGCGCAGCCCCGAGCAACTGGCCGCCGCTGTCATGTTCCGCTGCTACGACGAAGGCGTGCCGCCGCCGTCGATCCTCGTTTTCTCTGGCCGTGGCGTGCAAGCAAAGTGGCTGCTGGATGGCACCTTGCCGCGTCAGGCGCTGCCACGCTGGAATGCCTGCCAGCGTTACCTGATCGACCGTCTGGCCGGGCTGGGCGCTGATCCAGCGGCCAAGGATGCAAGCCGCGTGCTGCGGCTGGTCAATACGGTGAACAGCAAGAGCGGCGAGGTTTGCCGCGTCATCCACGTTGAGCAAGGCCCGGACGGCGAGCCGATCCGGTACAACTTCGAGTATCTGGCCGAGGCGCTACTGCCGGTGGCCCGCTGGGACATCGAGGCCGACCGCAAGGCCCGCGCCGACCGTCGCCAGTTCAAGCTGCTGCCGGGCGGCCAAACCGGCAACCTGCGCACGCTCAACGGGCGGCAACTGGCGTGGGATCGTCTGGAGGACTTGCGCACGCTGGCCGCGCTGCGCGGCGGCGTGGCCGAGGGCGAGCGGATGCAGCACCTGTTTTGGCGGCTGAATTTCCTGCTGCTGTCAGGTGCGACGCACACCGGCCAGATGTACCACGAGGCCGCCGCGCTGGCCCGTGAGCTTGACCCACGGTGGAACTACCGCAGCGCCGAGCTTATGACGCTGTACGCCAAGGCCAAGGCCCACGAAGCCGGGGAAAAGGTGGAGTTCGGCGGCAAGCAGTTTGCGCCGCTCTACACGCCCAAGAACGACACGCTTATCAGCCTGTTTCACATCACCGACGACGAGCAGCGCAAGCTGCGCACGCTCATCAGCCGGGACATGGCCGCAGAGCGCCACAGCGAGCGCGAGAAAGCCCGCAGACGTGCCGCTGGGGCTGTCGATCGTGCTTCCTATCTGGAAGCAGCCAGCGCCAAGCAGGCGCAGGCTTTGGCCCTCAAGGCGCAGGGTCTGAGCGTGCGGGCCATTGCTGCACAGATGGGCATTAGCAAGACCGCTGCCGGGCGCTACATCGCAGAGCCGGGAGAGTGTCCCAAGTCCATGCGTATTACAGGCGGGGAGGGCTGA

>p10265-KPC (KU578314)

ATGGGACAGGCACAGCTACGACTTTTCAGCCCAGCCGATGAGGCGGGTTGCTATCACGACACAGCCCGGCAGGGCTTTTTCTCGTTGCTCATGGCGACGTGCGAGGGCAGCGGCAAGAAGCAGGACAGTTACCGGCTGTCACAGATGCCCGTGGTGCTCTCCATGCTCGACCACAGCCGGGATACCTGGCTGTCTCAGGCTGAGTTCATCAAGCCCAATCGCCGCGTGGTCAACTTGGCCCGCATCGGCTTGCTGTTCGCCGATCTGGACACCTACCGCGAGCCGTGGGCGCAGGGGCGCAGCCCCGAGCAACTGGCCGCCGCTGTCATGTTCCGCTGCTACGACGAAGGCGTGCCGCCGCCGTCGATCCTCGTTTTCTCTGGCCGTGGCGTGCAAGCAAAGTGGCTGCTGGATGGCACCTTGCCGCGTCAGGCGCTGCCACGCTGGAATGCCTGCCAGCGTTACCTGATCGACCGTCTGGCCGGGCTGGGCGCTGATCCAGCGGCCAAGGATGCAAGCCGCGTGCTGCGGCTGGTCAATACGGTGAACAGCAAGAGCGGCGAGGTTTGCCGCGTCATCCACGTTGAGCAAGGCCCGGACGGCGAGCCGATCCGGTACAACTTCGAGTATCTGGCCGAGGCGCTACTGCCGGTGGCCCGCTGGGACATCGAGGCCGACCGCAAGGCCCGCGCCGACCGTCGCCAGTTCAAGCTGCTGCCGGGCGGCCAAACCGGCAACCTGCGCACGCTCAACGGGCGGCAACTGGCGTGGGATCGTCTGGAGGACTTGCGCACGCTGGCCGCGCTGCGCGGCGGCGTGGCCGAGGGCGAGCGGATGCAGCACCTGTTTTGGCGGCTGAATTTCCTGCTGCTGTCAGGTGCGACGCACACCGGCCAGATGTACCACGAGGCCGCCGCGCTGGCCCGTGAGCTTGACCCACGGTGGAACTACCGCAGCGCCGAGCTTATGACGCTGTACGCCAAGGCCAAGGCCCACGAAGCCGGGGAAAAGGTGGAGTTCGGCGGCAAGCAGTTTGCGCCGCTCTACACGCCCAAGAACGACACGCTTATCAGCCTGTTTCACATCACCGACGACGAGCAGCGCAAGCTGCGCACGCTCATCAGCCGGGACATGGCCGCAGAGCGCCACAGCGAGCGCGAGAAAGCCCGCAGACGTGCCGCTGGGGCTGTCGATCGTGCTTCCTATCTGGAAGCAGCCAGCGCCAAGCAGGCGCAGGCTTTGGCCCTCAAGGCGCAGGGTCTGAGCGTGCGGGCCATTGCTGCACAGATGGGCATTAGCAAGACCGCTGCCGGGCGCTACATCGCAGAGCCGGGAGAGTGTCCCAAGTCCATGCGTATTACAGGCGGGGAGGGCTGA

**Table S3. Pairwise comparison of the *repA* sequences of 29 plasmids using ANI analysis**

|  | **1** | **2** | **3** | **4** | **5** | **6** | **7** | **8** | **9** | **10** |
| --- | --- | --- | --- | --- | --- | --- | --- | --- | --- | --- |
| **1** | 100 | 95 | 93 | 93.5 | 93.3 | 93.6 | 93.6 | 93.5 | 93.6 | 93.5 |
| **2** | 95 | 100 | 96.8 | 97 | 97.4 | 97.5 | 97.5 | 97.5 | 97.5 | 97.4 |
| **3** | 93 | 96.8 | 100 | 96.9 | 97.3 | 97.5 | 97.5 | 97.4 | 97.5 | 97.5 |
| **4** | 93.5 | 97 | 96.9 | 100 | 98.6 | 98.7 | 98.6 | 98.5 | 98.6 | 98.6 |
| **5** | 93.3 | 97.4 | 97.3 | 98.6 | 100 | 99.5 | 99.4 | 99.3 | 99.4 | 99.4 |
| **6** | 93.6 | 97.5 | 97.5 | 98.7 | 99.5 | 100 | 99.7 | 99.8 | 99.9 | 99.9 |
| **7** | 93.6 | 97.5 | 97.5 | 98.6 | 99.4 | 99.7 | 100 | 99.7 | 99.8 | 99.6 |
| **8** | 93.5 | 97.5 | 97.4 | 98.5 | 99.3 | 99.8 | 99.7 | 100 | 99.9 | 99.7 |
| **9** | 93.6 | 97.5 | 97.5 | 98.6 | 99.4 | 99.9 | 99.8 | 99.9 | 100 | 99.8 |
| **10** | 93.5 | 97.4 | 97.5 | 98.6 | 99.4 | 99.9 | 99.6 | 99.7 | 99.8 | 100 |
| **11** | 93.4 | 97.4 | 97.3 | 98.4 | 99 | 99.5 | 99.6 | 99.5 | 99.6 | 99.4 |
| **12** | 93.6 | 97.5 | 97.5 | 98.6 | 99.4 | 99.9 | 99.8 | 99.9 | 100 | 99.8 |
| **13** | 93.5 | 97.5 | 97.4 | 98.5 | 99.3 | 99.8 | 99.7 | 99.8 | 99.9 | 99.7 |
| **14** | 93.2 | 97.2 | 96.9 | 98.2 | 98.6 | 98.7 | 98.8 | 98.7 | 98.8 | 98.6 |
| **15** | 93.5 | 97.1 | 97.1 | 97.6 | 98 | 98.5 | 98.6 | 98.5 | 98.6 | 98.4 |
| **16** | 92.3 | 96 | 96.1 | 97.3 | 98.2 | 98.5 | 98.4 | 98.3 | 98.4 | 98.4 |
| **17** | 92.5 | 96.7 | 96.4 | 97.7 | 98.1 | 98.2 | 98.3 | 98.2 | 98.3 | 98.1 |
| **18** | 92.5 | 96.6 | 96.3 | 97.6 | 98 | 98.1 | 98.2 | 98.1 | 98.2 | 98 |
| **19** | 92.3 | 96.2 | 96 | 97.2 | 97.5 | 98 | 98.1 | 98 | 98.1 | 97.9 |
| **20** | 92.5 | 96.6 | 96.3 | 97.6 | 98.2 | 98.3 | 98.2 | 98.3 | 98.4 | 98.2 |
| **21** | 92.5 | 96.7 | 96.4 | 97.7 | 98.1 | 98.2 | 98.3 | 98.2 | 98.3 | 98.1 |
| **22** | 92.5 | 96.6 | 96.3 | 97.6 | 98 | 98.1 | 98.2 | 98.1 | 98.2 | 98 |
| **23** | 92.5 | 96.6 | 96.3 | 97.6 | 98 | 98.1 | 98.2 | 98.1 | 98.2 | 98 |
| **24** | 92.5 | 96.6 | 96.3 | 97.6 | 98.2 | 98.3 | 98.2 | 98.3 | 98.4 | 98.2 |
| **25** | 92.4 | 96.5 | 96.2 | 97.5 | 98.1 | 98.2 | 98.1 | 98.2 | 98.3 | 98.1 |
| **26** | 92.4 | 96.5 | 96.2 | 97.5 | 98.1 | 98.2 | 98.1 | 98.2 | 98.3 | 98.1 |
| **27** | 92.4 | 96.5 | 96.2 | 97.5 | 98.1 | 98.2 | 98.1 | 98.2 | 98.3 | 98.1 |
| **28** | 92.4 | 96.5 | 96.2 | 97.5 | 98.1 | 98.2 | 98.1 | 98.2 | 98.3 | 98.1 |
| **29** | 92.4 | 96.5 | 96.2 | 97.5 | 98.1 | 98.2 | 98.1 | 98.2 | 98.3 | 98.1 |

The specific names of 29 plasmids are shown in Fig. 2

**Table S3.** (continued)

|  | **11** | **12** | **13** | **14** | **15** | **16** | **17** | **18** | **19** | **20** |
| --- | --- | --- | --- | --- | --- | --- | --- | --- | --- | --- |
| **1** | 93.4 | 93.6 | 93.5 | 93.2 | 93.5 | 92.3 | 92.5 | 92.5 | 92.3 | 92.5 |
| **2** | 97.4 | 97.5 | 97.5 | 97.2 | 97.1 | 96 | 96.7 | 96.6 | 96.2 | 96.6 |
| **3** | 97.3 | 97.5 | 97.4 | 96.9 | 97.1 | 96.1 | 96.4 | 96.3 | 96 | 96.3 |
| **4** | 98.4 | 98.6 | 98.5 | 98.2 | 97.6 | 97.3 | 97.7 | 97.6 | 97.2 | 97.6 |
| **5** | 99 | 99.4 | 99.3 | 98.6 | 98 | 98.2 | 98.1 | 98 | 97.5 | 98.2 |
| **6** | 99.5 | 99.9 | 99.8 | 98.7 | 98.5 | 98.5 | 98.2 | 98.1 | 98 | 98.3 |
| **7** | 99.6 | 99.8 | 99.7 | 98.8 | 98.6 | 98.4 | 98.3 | 98.2 | 98.1 | 98.2 |
| **8** | 99.5 | 99.9 | 99.8 | 98.7 | 98.5 | 98.3 | 98.2 | 98.1 | 98 | 98.3 |
| **9** | 99.6 | 100 | 99.9 | 98.8 | 98.6 | 98.4 | 98.3 | 98.2 | 98.1 | 98.4 |
| **10** | 99.4 | 99.8 | 99.7 | 98.6 | 98.4 | 98.4 | 98.1 | 98 | 97.9 | 98.2 |
| **11** | 100 | 99.6 | 99.5 | 98.6 | 98.4 | 98 | 98.1 | 98 | 97.9 | 98 |
| **12** | 99.6 | 100 | 99.9 | 98.8 | 98.6 | 98.4 | 98.3 | 98.2 | 98.1 | 98.4 |
| **13** | 99.5 | 99.9 | 100 | 98.7 | 98.5 | 98.3 | 98.2 | 98.1 | 98 | 98.3 |
| **14** | 98.6 | 98.8 | 98.7 | 100 | 98.6 | 97.8 | 98.5 | 98.4 | 97.9 | 98.4 |
| **15** | 98.4 | 98.6 | 98.5 | 98.6 | 100 | 97.6 | 97.9 | 97.8 | 97.7 | 97.8 |
| **16** | 98 | 98.4 | 98.3 | 97.8 | 97.6 | 100 | 99.1 | 99 | 98.9 | 99.2 |
| **17** | 98.1 | 98.3 | 98.2 | 98.5 | 97.9 | 99.1 | 100 | 99.9 | 99.4 | 99.9 |
| **18** | 98 | 98.2 | 98.1 | 98.4 | 97.8 | 99 | 99.9 | 100 | 99.5 | 99.8 |
| **19** | 97.9 | 98.1 | 98 | 97.9 | 97.7 | 98.9 | 99.4 | 99.5 | 100 | 99.3 |
| **20** | 98 | 98.4 | 98.3 | 98.4 | 97.8 | 99.2 | 99.9 | 99.8 | 99.3 | 100 |
| **21** | 98.1 | 98.3 | 98.2 | 98.5 | 97.9 | 99.1 | 100 | 99.9 | 99.4 | 99.9 |
| **22** | 98 | 98.2 | 98.1 | 98.4 | 97.8 | 99 | 99.9 | 99.8 | 99.3 | 99.8 |
| **23** | 98 | 98.2 | 98.1 | 98.4 | 97.8 | 99 | 99.9 | 99.8 | 99.3 | 99.8 |
| **24** | 98 | 98.4 | 98.3 | 98.4 | 97.8 | 99.2 | 99.9 | 99.8 | 99.3 | 100 |
| **25** | 97.9 | 98.3 | 98.2 | 98.3 | 97.7 | 99.1 | 99.8 | 99.7 | 99.2 | 99.9 |
| **26** | 97.9 | 98.3 | 98.2 | 98.3 | 97.7 | 99.1 | 99.8 | 99.7 | 99.2 | 99.9 |
| **27** | 97.9 | 98.3 | 98.2 | 98.3 | 97.7 | 99.1 | 99.8 | 99.7 | 99.2 | 99.9 |
| **28** | 97.9 | 98.3 | 98.2 | 98.3 | 97.7 | 99.1 | 99.8 | 99.7 | 99.2 | 99.9 |
| **29** | 97.9 | 98.3 | 98.2 | 98.3 | 97.7 | 99.1 | 99.8 | 99.7 | 99.2 | 99.9 |

**Table S3.** (continued)

|  | **21** | **22** | **23** | **24** | **25** | **26** | **27** | **28** | **29** |
| --- | --- | --- | --- | --- | --- | --- | --- | --- | --- |
| **1** | 92.5 | 92.5 | 92.5 | 92.5 | 92.4 | 92.4 | 92.4 | 92.4 | 92.4 |
| **2** | 96.7 | 96.6 | 96.6 | 96.6 | 96.5 | 96.5 | 96.5 | 96.5 | 96.5 |
| **3** | 96.4 | 96.3 | 96.3 | 96.3 | 96.2 | 96.2 | 96.2 | 96.2 | 96.2 |
| **4** | 97.7 | 97.6 | 97.6 | 97.6 | 97.5 | 97.5 | 97.5 | 97.5 | 97.5 |
| **5** | 98.1 | 98 | 98 | 98.2 | 98.1 | 98.1 | 98.1 | 98.1 | 98.1 |
| **6** | 98.2 | 98.1 | 98.1 | 98.3 | 98.2 | 98.2 | 98.2 | 98.2 | 98.2 |
| **7** | 98.3 | 98.2 | 98.2 | 98.2 | 98.1 | 98.1 | 98.1 | 98.1 | 98.1 |
| **8** | 98.2 | 98.1 | 98.1 | 98.3 | 98.2 | 98.2 | 98.2 | 98.2 | 98.2 |
| **9** | 98.3 | 98.2 | 98.2 | 98.4 | 98.3 | 98.3 | 98.3 | 98.3 | 98.3 |
| **10** | 98.1 | 98 | 98 | 98.2 | 98.1 | 98.1 | 98.1 | 98.1 | 98.1 |
| **11** | 98.1 | 98 | 98 | 98 | 97.9 | 97.9 | 97.9 | 97.9 | 97.9 |
| **12** | 98.3 | 98.2 | 98.2 | 98.4 | 98.3 | 98.3 | 98.3 | 98.3 | 98.3 |
| **13** | 98.2 | 98.1 | 98.1 | 98.3 | 98.2 | 98.2 | 98.2 | 98.2 | 98.2 |
| **14** | 98.5 | 98.4 | 98.4 | 98.4 | 98.3 | 98.3 | 98.3 | 98.3 | 98.3 |
| **15** | 97.9 | 97.8 | 97.8 | 97.8 | 97.7 | 97.7 | 97.7 | 97.7 | 97.7 |
| **16** | 99.1 | 99 | 99 | 99.2 | 99.1 | 99.1 | 99.1 | 99.1 | 99.1 |
| **17** | 100 | 99.9 | 99.9 | 99.9 | 99.8 | 99.8 | 99.8 | 99.8 | 99.8 |
| **18** | 99.9 | 99.8 | 99.8 | 99.8 | 99.7 | 99.7 | 99.7 | 99.7 | 99.7 |
| **19** | 99.4 | 99.3 | 99.3 | 99.3 | 99.2 | 99.2 | 99.2 | 99.2 | 99.2 |
| **20** | 99.9 | 99.8 | 99.8 | 100 | 99.9 | 99.9 | 99.9 | 99.9 | 99.9 |
| **21** | 100 | 99.9 | 99.9 | 99.9 | 99.8 | 99.8 | 99.8 | 99.8 | 99.8 |
| **22** | 99.9 | 100 | 99.8 | 99.8 | 99.7 | 99.7 | 99.7 | 99.7 | 99.7 |
| **23** | 99.9 | 99.8 | 100 | 99.8 | 99.7 | 99.7 | 99.7 | 99.7 | 99.7 |
| **24** | 99.9 | 99.8 | 99.8 | 100 | 99.9 | 99.9 | 99.9 | 99.9 | 99.9 |
| **25** | 99.8 | 99.7 | 99.7 | 99.9 | 100 | 100 | 100 | 100 | 100 |
| **26** | 99.8 | 99.7 | 99.7 | 99.9 | 100 | 100 | 100 | 100 | 100 |
| **27** | 99.8 | 99.7 | 99.7 | 99.9 | 100 | 100 | 100 | 100 | 100 |
| **28** | 99.8 | 99.7 | 99.7 | 99.9 | 100 | 100 | 100 | 100 | 100 |
| **29** | 99.8 | 99.7 | 99.7 | 99.9 | 100 | 100 | 100 | 100 | 100 |

| **(coverage+identity)** | **P10265-KPC** | **P30860-KPC** | **pA1706-KPC** | **P116965-KPC** | **pA1705-KPC** | **P72005-KPC** |
| --- | --- | --- | --- | --- | --- | --- |
| **P10265-KPC** | (100%+100%) | (99%+99.90%) | (99%+99.90%) | (96%+99.99%) | (99%+99.91%) | (69%+98.19%) |
| **P30860-KPC** | (100%+99.90%) | (100%+100%) | (100%+99.91%) | (96%+99.99%) | (100%+99.99%) | (69%+98.22%) |
| **pA1706-KPC** | (100%+99.90%) | (100%+99.91%) | (100%+100%) | (96%+99.81%) | (100%+99.91%) | (69%+97.97%) |
| **P116965-KPC** | (98%+99.99%) | (98%+99.99%) | (98%+99.81%) | (100%+100%) | (98%+100%) | (68%+98.23%) |
| **pA1705-KPC** | (100%+99.91%) | (100%+99.99%) | (100%+99.91%) | (96%+100%) | (100%+100%) | (69%+98.23%) |
| **P72005-KPC** | (58%+98.19%) | (58%+98.22%) | (58%+97.97%) | (56%+98.23%) | (56%+98.23%) | (100%+100%) |

**Table S4. Pairwise comparison of plasmid sequences using BLASTN**

**Figure S1 PCR electrophoregram**

**
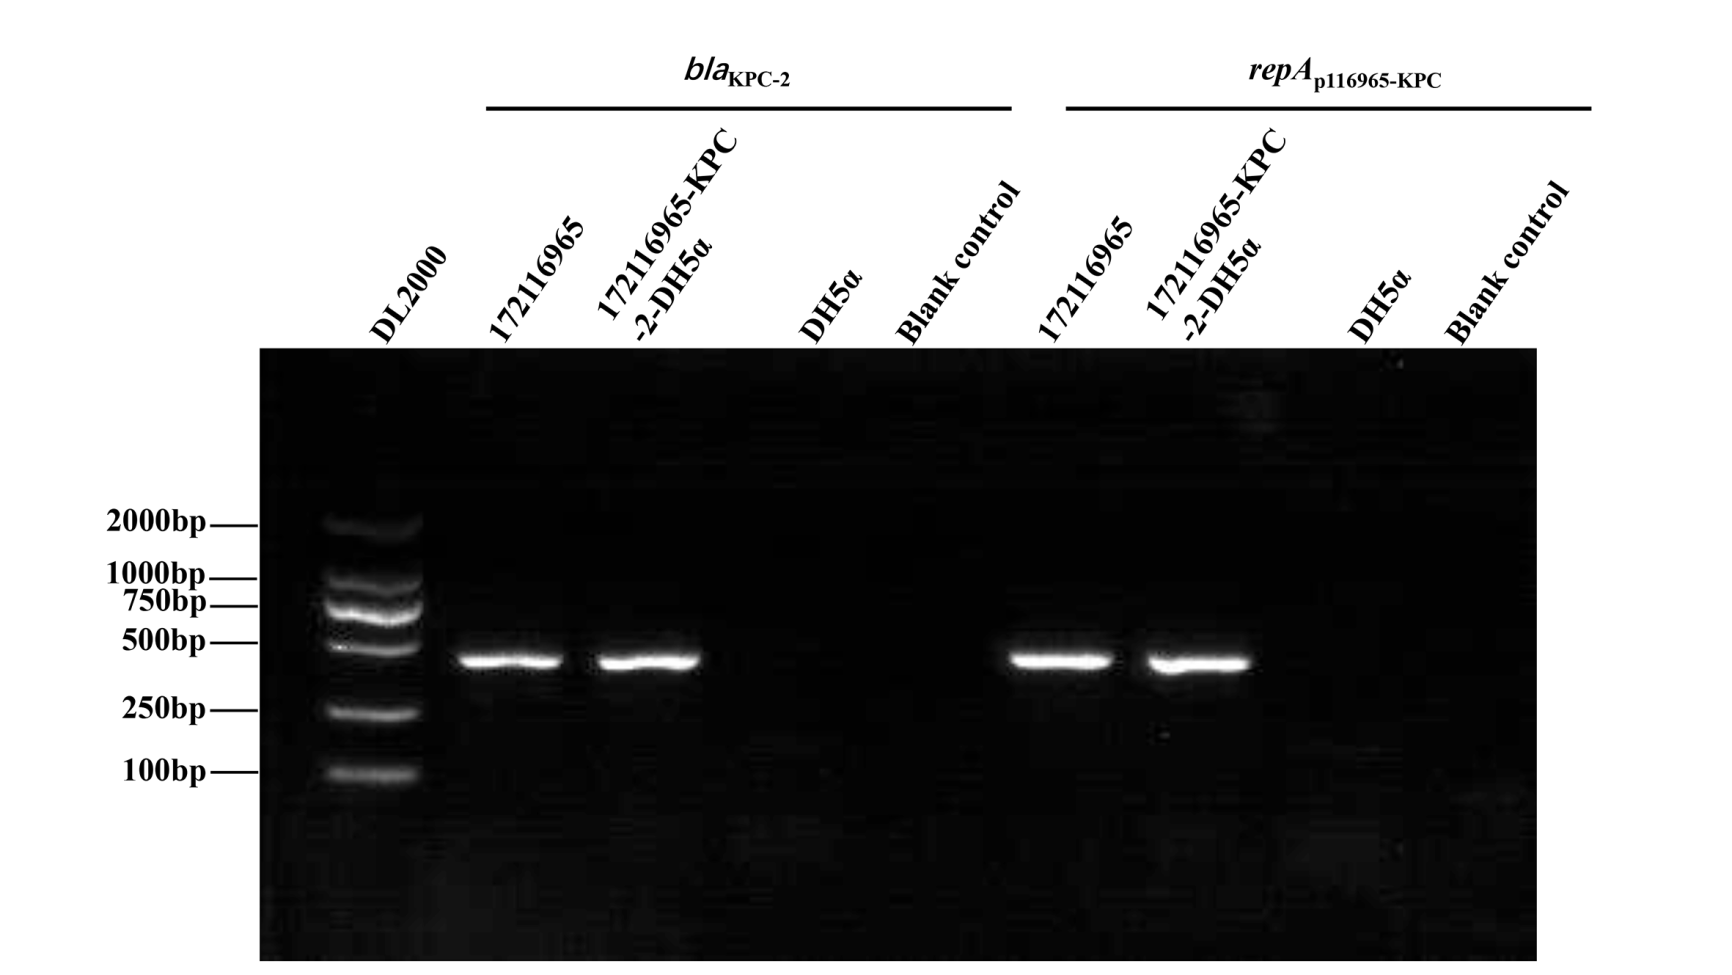
**
